# Supplementary material
Source: PubMed Central journal article supplement (PMC2678447)
Supplement: 0812768106_Appendix_PDF.pdf [file 0812768106_Appendix_PDF.pdf]

# **Supplemental material for “Experimentally observed phenomena on cardiac energetics in heart failure emerge from simulations of cardiac metabolism”**

Fan Wu\*, Jianyi Zhang†, and Daniel A. Beard\*‡

\*Biotechnology and Bioengineering Center and Department of Physiology, Medical College of Wisconsin

†Cardiology Division, Department of Medicine, University of Minnesota Medical School

‡Corresponding Author: Daniel A. Beard, Medical College of Wisconsin, 8701 Watertown Plank Road, Milwaukee, WI 53226, E-mail: [dbeard@mcw.edu](mailto:dbeard@mcw.edu)

## S1. List of model components

The computational model applied in the current study integrates computational models of cellular metabolism and oxygen transport in cardiac tissue previously published by Beard et al. (1-3). Please refer to these published papers and the associated supplemental material for detailed descriptions of model parameterization and validation.

This appendix lists the basic components of the current model. Figure S1 illustrates components of the computational model of cardiac energetics and oxygen transport. Table S1 summarizes the metabolite pools in canine hearts at different stages of left ventricular hypertrophy (LVH). Table S2 lists values of myocardial cellular volumes and water fractions from Reference (4). Tables S3 and S4 list the state variables and reaction and transport fluxes considered in the model. Table S5 lists model parameters.

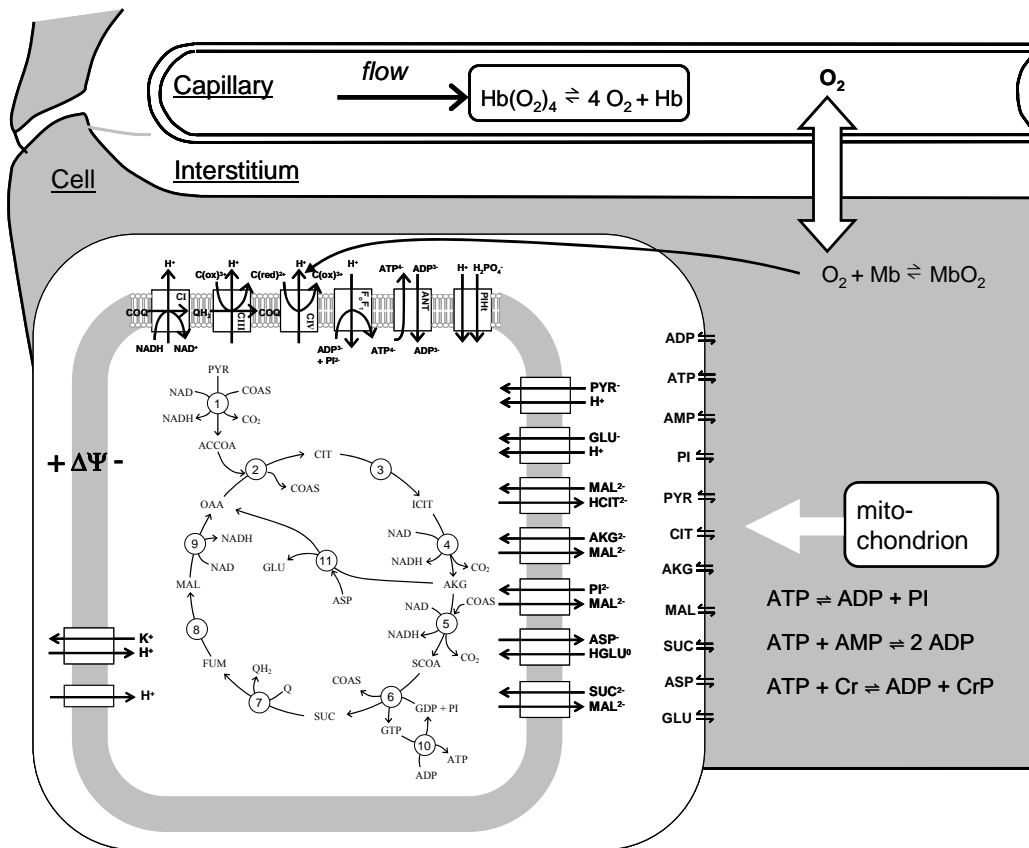

**Figure S1: Diagram of model used to simulate cardiac tissue oxygen transport and energy metabolism.**

Oxygen is transported via advection in capillaries, diffuses into cardiomyocytes from capillaries through interstitium, and is reduced into water via the complex IV reaction in mitochondria. Please see references (1, 5) for detailed procedures of parameterization and validation of models of cellular energy metabolism and oxygen transport.

**Table S1: Metabolic pools in canine hearts at different stages of left ventricular hypertrophy (LVH).**

| Concentrations <sup>*†</sup><br>(mmol (l cell) <sup>-1</sup> ) | Normal | Early-stage LVH <sup>‡</sup> | Moderate LVH <sup>‡</sup> |
|----------------------------------------------------------------|--------|------------------------------|---------------------------|
| CR <sub>tot</sub>                                              | 35.04  | 35.56 (+1.5%)                | 30.26 (-13.6%)            |
| ATP <sub>BL</sub>                                              | 7.23   | 6.81 (-5.8%)                 | 5.27 (-27.1%)             |
| CrP <sub>BL</sub>                                              | 15.33  | 15.05 (-1.8%)                | 8.16 (-46.8%)             |
| TEP                                                            | 29.78  | 28.69 (-3.7%)                | 18.72 (-37.1%)            |
| TAN                                                            | 8.62   | 8.20 (-4.9%)                 | 6.85 (-20.5%)             |

\*Concentrations of total creatine pool (CR<sub>tot</sub>), basal ATP content (ATP<sub>BL</sub>), and basal CrP content (CrP<sub>BL</sub>) are obtained from the biopsy measurement in Zhang et al. (6), Bache et al. (7), and Bache et al. (8), respectively.

†Concentrations of total exchangeable phosphate pool (TEP) and total adenine nucleotide pool (TAN) are estimated based on the experimental measurements of CR<sub>tot</sub>, ATP<sub>BL</sub>, and CrP<sub>BL</sub>.

‡Percentages listed in parentheses denote relative changes of the concentrations from the basal values.

**Table S2: Myocardial cellular volumes and water fractions**

| Variables         | Value  | Unit                                     |
|-------------------|--------|------------------------------------------|
| V <sub>cyto</sub> | 0.6801 | ml cytoplasm (ml cell) <sup>-1</sup>     |
| V <sub>mito</sub> | 0.2882 | ml mitochondria (ml cell) <sup>-1</sup>  |
| W <sub>c</sub>    | 0.8425 | ml water (ml cytoplasm) <sup>-1</sup>    |
| W <sub>i</sub>    | 0.0724 | ml water (ml mitochondria) <sup>-1</sup> |
| W <sub>x</sub>    | 0.6514 | ml water (ml mitochondria) <sup>-1</sup> |

**Table S3: Model variables**

| Variables                          | Descriptions                                         | Units                              |
|------------------------------------|------------------------------------------------------|------------------------------------|
| Oxygen Concentration:              |                                                      |                                    |
| C <sub>O2, capillary</sub>         | Total oxygen concentration in capillary              | mol (l capillary) <sup>-1</sup>    |
| C <sub>O2, interstitium</sub>      | Total oxygen concentration in interstitium           | mol (l interstitium) <sup>-1</sup> |
| C <sub>O2, cell</sub>              | Total oxygen concentration in myocyte                | mol (l cell) <sup>-1</sup>         |
| Mitochondrial membrane potential : |                                                      |                                    |
| ΔΨ                                 | Mitochondrial membrane potential                     | mV                                 |
| Mitochondrial Matrix Variables:    |                                                      |                                    |
| [H <sup>+</sup> ] <sub>x</sub>     | Concentration of H <sup>+</sup> ion in mito matrix   | mol (l matrix water) <sup>-1</sup> |
| [K <sup>+</sup> ] <sub>x</sub>     | Concentration of K <sup>+</sup> ion in mito matrix   | mol (l matrix water) <sup>-1</sup> |
| [Mg <sup>2+</sup> ] <sub>x</sub>   | Concentration of Mg <sup>2+</sup> ion in mito matrix | mol (l matrix water) <sup>-1</sup> |
| [NADH] <sub>x</sub>                | Concentration of NADH in mito matrix                 | mol (l matrix water) <sup>-1</sup> |

|                                               |                                                         |                                    |
|-----------------------------------------------|---------------------------------------------------------|------------------------------------|
| $[\text{NAD}]_x$                              | Concentration of NAD in mito matrix                     | $\text{mol (l matrix water)}^{-1}$ |
| $[\text{QH}_2]_x$                             | Concentration of reduced ubiquinol in mito matrix       | $\text{mol (l matrix water)}^{-1}$ |
| $[\text{COQ}]_x$                              | Concentration of oxidized ubiquinol in mito matrix      | $\text{mol (l matrix water)}^{-1}$ |
| $[\text{ATP}]_x$                              | Concentration of total ATP in mito matrix               | $\text{mol (l matrix water)}^{-1}$ |
| $[\text{ADP}]_x$                              | Concentration of total ADP in mito matrix               | $\text{mol (l matrix water)}^{-1}$ |
| $[\text{GTP}]_x$                              | Concentration of total GTP in mito matrix               | $\text{mol (l matrix water)}^{-1}$ |
| $[\text{GDP}]_x$                              | Concentration of total GDP in mito matrix               | $\text{mol (l matrix water)}^{-1}$ |
| $[\text{PI}]_x$                               | Concentration of inorganic phosphate in mito matrix     | $\text{mol (l matrix water)}^{-1}$ |
| $[\text{PYR}]_x$                              | Concentration of pyruvate in mito matrix                | $\text{mol (l matrix water)}^{-1}$ |
| $[\text{COASH}]_x$                            | Concentration of CoA-SH in mito matrix                  | $\text{mol (l matrix water)}^{-1}$ |
| $[\text{ACCOA}]_x$                            | Concentration of acetyl-CoA in mito matrix              | $\text{mol (l matrix water)}^{-1}$ |
| $[\text{OAA}]_x$                              | Concentration of oxaloacetate in mito matrix            | $\text{mol (l matrix water)}^{-1}$ |
| $[\text{CIT}]_x$                              | Concentration of citrate in mito matrix                 | $\text{mol (l matrix water)}^{-1}$ |
| $[\text{ICIT}]_x$                             | Concentration of isocitrate in mito matrix              | $\text{mol (l matrix water)}^{-1}$ |
| $[\text{AKG}]_x$                              | Concentration of $\alpha$ -ketoglutarate in mito matrix | $\text{mol (l matrix water)}^{-1}$ |
| $[\text{SCOA}]_x$                             | Concentration of succinyl-CoA in mito matrix            | $\text{mol (l matrix water)}^{-1}$ |
| $[\text{SUC}]_x$                              | Concentration of pyruvate in mito matrix                | $\text{mol (l matrix water)}^{-1}$ |
| $[\text{FUM}]_x$                              | Concentration of fumarate in mito matrix                | $\text{mol (l matrix water)}^{-1}$ |
| $[\text{MAL}]_x$                              | Concentration of malate in mito matrix                  | $\text{mol (l matrix water)}^{-1}$ |
| $[\text{ASP}]_x$                              | Concentration of aspartate in mito matrix               | $\text{mol (l matrix water)}^{-1}$ |
| $[\text{GLU}]_x$                              | Concentration of glutamate in mito matrix               | $\text{mol (l matrix water)}^{-1}$ |
| $[\text{O}_2]_x$                              | Concentration of oxygen in mito matrix                  | $\text{mol (l matrix water)}^{-1}$ |
| $[\text{CO}_2\text{tot}]_x$                   | Concentration of total $\text{CO}_2$ in mito matrix     | $\text{mol (l matrix water)}^{-1}$ |
| Mitochondrial Inter-Membrane Space Variables: |                                                         |                                    |
| $[\text{H}^+]_i$                              | Concentration of $\text{H}^+$ ion in IM space           | $\text{mol (l IM water)}^{-1}$     |
| $[\text{K}^+]_i$                              | Concentration of $\text{K}^+$ ion in IM space           | $\text{mol (l IM water)}^{-1}$     |
| $[\text{Mg}^{2+}]_i$                          | Concentration of $\text{Mg}^{2+}$ ion in IM space       | $\text{mol (l IM water)}^{-1}$     |
| $[\text{Cred}]_i$                             | Concentration of reduced cytochrome C in IM space       | $\text{mol (l IM water)}^{-1}$     |
| $[\text{Cox}]_i$                              | Concentration of oxidized cytochrome C in IM space      | $\text{mol (l IM water)}^{-1}$     |
| $[\text{ATP}]_i$                              | Concentration of total ATP in IM space                  | $\text{mol (l IM water)}^{-1}$     |
| $[\text{ADP}]_i$                              | Concentration of total ADP in IM space                  | $\text{mol (l IM water)}^{-1}$     |
| $[\text{AMP}]_i$                              | Concentration of total AMP in IM space                  | $\text{mol (l IM water)}^{-1}$     |
| $[\text{PI}]_i$                               | Concentration of inorganic phosphate in IM space        | $\text{mol (l IM water)}^{-1}$     |
| $[\text{PYR}]_i$                              | Concentration of pyruvate in IM space                   | $\text{mol (l IM water)}^{-1}$     |

|                                  |                                                    |                                       |
|----------------------------------|----------------------------------------------------|---------------------------------------|
| [CIT] <sub>i</sub>               | Concentration of citrate in IM space               | mol (l IM water) <sup>-1</sup>        |
| [AKG] <sub>i</sub>               | Concentration of α-ketoglutarate in IM space       | mol (l IM water) <sup>-1</sup>        |
| [SUC] <sub>i</sub>               | Concentration of pyruvate in IM space              | mol (l IM water) <sup>-1</sup>        |
| [FUM] <sub>i</sub>               | Concentration of fumarate in IM space              | mol (l IM water) <sup>-1</sup>        |
| [MAL] <sub>i</sub>               | Concentration of malate in IM space                | mol (l IM water) <sup>-1</sup>        |
| [ASP] <sub>i</sub>               | Concentration of aspartate in IM space             | mol (l IM water) <sup>-1</sup>        |
| [GLU] <sub>i</sub>               | Concentration of glutamate in IM space             | mol (l IM water) <sup>-1</sup>        |
| Cytoplasm Variables:             |                                                    |                                       |
| [H <sup>+</sup> ] <sub>c</sub>   | Concentration of H <sup>+</sup> ion in cytoplasm   | mol (l cytoplasm water) <sup>-1</sup> |
| [K <sup>+</sup> ] <sub>c</sub>   | Concentration of K <sup>+</sup> ion in cytoplasm   | mol (l cytoplasm water) <sup>-1</sup> |
| [Mg <sup>2+</sup> ] <sub>c</sub> | Concentration of Mg <sup>2+</sup> ion in cytoplasm | mol (l cytoplasm water) <sup>-1</sup> |
| [ATP] <sub>c</sub>               | Concentration of total ATP in cytoplasm            | mol (l cytoplasm water) <sup>-1</sup> |
| [ADP] <sub>c</sub>               | Concentration of total ADP in cytoplasm            | mol (l cytoplasm water) <sup>-1</sup> |
| [AMP] <sub>c</sub>               | Concentration of total ADP in cytoplasm            | mol (l cytoplasm water) <sup>-1</sup> |
| [PI] <sub>c</sub>                | Concentration of inorganic phosphate in cytoplasm  | mol (l cytoplasm water) <sup>-1</sup> |
| [PYR] <sub>c</sub>               | Concentration of pyruvate in cytoplasm             | mol (l cytoplasm water) <sup>-1</sup> |
| [CIT] <sub>c</sub>               | Concentration of citrate in cytoplasm              | mol (l cytoplasm water) <sup>-1</sup> |
| [AKG] <sub>c</sub>               | Concentration of α-ketoglutarate in cytoplasm      | mol (l cytoplasm water) <sup>-1</sup> |
| [SUC] <sub>c</sub>               | Concentration of pyruvate in cytoplasm             | mol (l cytoplasm water) <sup>-1</sup> |
| [FUM] <sub>c</sub>               | Concentration of fumarate in cytoplasm             | mol (l cytoplasm water) <sup>-1</sup> |
| [MAL] <sub>c</sub>               | Concentration of malate in cytoplasm               | mol (l cytoplasm water) <sup>-1</sup> |
| [ASP] <sub>c</sub>               | Concentration of aspartate in cytoplasm            | mol (l cytoplasm water) <sup>-1</sup> |
| [GLU] <sub>c</sub>               | Concentration of glutamate in cytoplasm            | mol (l cytoplasm water) <sup>-1</sup> |
| [CrP] <sub>c</sub>               | Concentration of phosphate creatine in cytoplasm   | mol (l cytoplasm water) <sup>-1</sup> |
| [Cr] <sub>c</sub>                | Concentration of creatine in cytoplasm             | mol (l cytoplasm water) <sup>-1</sup> |

**Table S4: Reaction and transport fluxes**

| Flux                     | Description                                   | Units                                      |
|--------------------------|-----------------------------------------------|--------------------------------------------|
| Mitochondrial Reactions: |                                               |                                            |
| $J_{C1}$                 | Complex I                                     | mol s <sup>-1</sup> (l mito) <sup>-1</sup> |
| $J_{C3}$                 | Complex III                                   | mol s <sup>-1</sup> (l mito) <sup>-1</sup> |
| $J_{C4}$                 | Complex IV                                    | mol s <sup>-1</sup> (l mito) <sup>-1</sup> |
| $J_{F1}$                 | F <sub>1</sub> F <sub>0</sub> ATPase reaction | mol s <sup>-1</sup> (l mito) <sup>-1</sup> |
| $J_{ANT}$                | Adenine nucleotide translocase                | mol s <sup>-1</sup> (l mito) <sup>-1</sup> |

|                                 |                                                              |                                          |
|---------------------------------|--------------------------------------------------------------|------------------------------------------|
| $J_{PIHt}$                      | Phosphate-hydrogen co-transporter                            | $\text{mol s}^{-1} (\text{l mito})^{-1}$ |
| $J_{Hle}$                       | Proton leak                                                  | $\text{mol s}^{-1} (\text{l mito})^{-1}$ |
| $J_{KH}$                        | Mitochondrial $\text{K}^+ / \text{H}^+$ exchanger            | $\text{mol s}^{-1} (\text{l mito})^{-1}$ |
| $J_{pdh}$                       | Pyruvate dehydrogenase                                       | $\text{mol s}^{-1} (\text{l mito})^{-1}$ |
| $J_{cits}$                      | Citrate synthetase                                           | $\text{mol s}^{-1} (\text{l mito})^{-1}$ |
| $J_{acon}$                      | Aconitase                                                    | $\text{mol s}^{-1} (\text{l mito})^{-1}$ |
| $J_{isod}$                      | Isocitrate dehydrogenase                                     | $\text{mol s}^{-1} (\text{l mito})^{-1}$ |
| $J_{akgd}$                      | $\alpha$ -Ketoglutarate dehydrogenase                        | $\text{mol s}^{-1} (\text{l mito})^{-1}$ |
| $J_{scoas}$                     | Succinyl-CoA synthetase                                      | $\text{mol s}^{-1} (\text{l mito})^{-1}$ |
| $J_{sdh}$                       | Succinate dehydrogenase                                      | $\text{mol s}^{-1} (\text{l mito})^{-1}$ |
| $J_{fum}$                       | Fumarase                                                     | $\text{mol s}^{-1} (\text{l mito})^{-1}$ |
| $J_{mdh}$                       | Malate dehydrogenase                                         | $\text{mol s}^{-1} (\text{l mito})^{-1}$ |
| $J_{ndk}$                       | Nucleoside diphosphokinase                                   | $\text{mol s}^{-1} (\text{l mito})^{-1}$ |
| $J_{got}$                       | Glutamate oxaloacetate transaminase (Aspartate Transaminase) | $\text{mol s}^{-1} (\text{l mito})^{-1}$ |
| $J_{AKi}$                       | Mitochondrial adenylate kinase                               | $\text{mol s}^{-1} (\text{l mito})^{-1}$ |
| Mitochondrial Transport Fluxes: |                                                              |                                          |
| $J_{PYRH}$                      | Pyruvate- $\text{H}^+$ co-transporter                        | $\text{mol s}^{-1} (\text{l mito})^{-1}$ |
| $J_{GLUH}$                      | Glutamate- $\text{H}^+$ co-transporter                       | $\text{mol s}^{-1} (\text{l mito})^{-1}$ |
| $J_{CITMAL}$                    | Citrate/malate antiporter                                    | $\text{mol s}^{-1} (\text{l mito})^{-1}$ |
| $J_{AKGMAL}$                    | $\alpha$ -Ketoglutarate/malate antiporter                    | $\text{mol s}^{-1} (\text{l mito})^{-1}$ |
| $J_{SUCMAL}$                    | Succinate/malate antiporter                                  | $\text{mol s}^{-1} (\text{l mito})^{-1}$ |
| $J_{MALPI}$                     | Malate/phosphate antiporter                                  | $\text{mol s}^{-1} (\text{l mito})^{-1}$ |
| $J_{ASPLU}$                     | Aspartate/glutamate antiporter                               | $\text{mol s}^{-1} (\text{l mito})^{-1}$ |
| $J_{Pi}$                        | Phosphate transport across outer membrane                    | $\text{mol s}^{-1} (\text{l mito})^{-1}$ |
| $J_{ATPi}$                      | ATP transport across outer membrane                          | $\text{mol s}^{-1} (\text{l mito})^{-1}$ |
| $J_{ADPi}$                      | ADP transport across outer membrane                          | $\text{mol s}^{-1} (\text{l mito})^{-1}$ |
| $J_{AMPi}$                      | AMP transport across outer membrane                          | $\text{mol s}^{-1} (\text{l mito})^{-1}$ |
| $J_{PYRt}$                      | Pyruvate transport across outer membrane                     | $\text{mol s}^{-1} (\text{l mito})^{-1}$ |
| $J_{CITt}$                      | Citrate transport across outer membrane                      | $\text{mol s}^{-1} (\text{l mito})^{-1}$ |
| $J_{MALt}$                      | Malate transport across outer membrane                       | $\text{mol s}^{-1} (\text{l mito})^{-1}$ |
| $J_{AKGt}$                      | $\alpha$ -Ketoglutarate transport across outer membrane      | $\text{mol s}^{-1} (\text{l mito})^{-1}$ |
| $J_{SUCt}$                      | Succinate transport across outer membrane                    | $\text{mol s}^{-1} (\text{l mito})^{-1}$ |
| $J_{GLUt}$                      | Glutamate transport across outer membrane                    | $\text{mol s}^{-1} (\text{l mito})^{-1}$ |

|                      |                                           |                                          |
|----------------------|-------------------------------------------|------------------------------------------|
| $J_{ASPt}$           | Aspartate transport across outer membrane | $\text{mol s}^{-1} (\text{l mito})^{-1}$ |
| Cytoplasm Reactions: |                                           |                                          |
| $J_{ATPase}$         | Cytoplasmic ATP consumption rate          | $\text{mol s}^{-1} (\text{l cyto})^{-1}$ |
| $J_{AKc}$            | Cytoplasmic adenylate kinase              | $\text{mol s}^{-1} (\text{l cyto})^{-1}$ |
| $J_{CK}$             | Creatine kinase                           | $\text{mol s}^{-1} (\text{l cyto})^{-1}$ |

**Table S5: Model parameter**

| Parameter                            | Description                                                                   | Value                 | Units                                                         | Reference |
|--------------------------------------|-------------------------------------------------------------------------------|-----------------------|---------------------------------------------------------------|-----------|
| Enzyme activity and kinetic constant |                                                                               |                       |                                                               |           |
| $X_{pdh}$                            | Pyruvate dehydrogenase activity                                               | $1.22 \times 10^{-1}$ | $\text{mol s}^{-1} (\text{l mito})^{-1}$                      | (5)       |
| $X_{cits}$                           | Citrate synthase activity                                                     | 1.16                  | $\text{mol s}^{-1} (\text{l mito})^{-1}$                      | (5)       |
| $X_{acon}$                           | Aconitase activity                                                            | $3.21 \times 10^{-2}$ | $\text{mol s}^{-1} (\text{l mito})^{-1}$                      | (5)       |
| $X_{isod}$                           | Isocitrate dehydrogenase activity                                             | $4.25 \times 10^{-1}$ | $\text{mol s}^{-1} (\text{l mito})^{-1}$                      | (5)       |
| $X_{akgd}$                           | $\alpha$ -Ketoglutarate dehydrogenase activity                                | $7.70 \times 10^{-2}$ | $\text{mol s}^{-1} (\text{l mito})^{-1}$                      | (5)       |
| $K_{ir,akgd}$                        | Inhibition constant of NADH in $\alpha$ -Ketoglutarate dehydrogenase reaction | $6.04 \times 10^{-7}$ | M                                                             | (5)       |
| $X_{scoas}$                          | Succinyl-CoA synthetase activity                                              | $5.82 \times 10^{-1}$ | $\text{mol s}^{-1} (\text{l mito})^{-1}$                      | (5)       |
| $X_{sdh}$                            | Succinate dehydrogenase activity                                              | $6.23 \times 10^{-2}$ | $\text{mol s}^{-1} (\text{l mito})^{-1}$                      | (5)       |
| $X_{fuma}$                           | Fumarase activity                                                             | $7.12 \times 10^{-3}$ | $\text{mol s}^{-1} (\text{l mito})^{-1}$                      | (5)       |
| $X_{mdh}$                            | Malate dehydrogenase activity                                                 | $6.94 \times 10^{-2}$ | $\text{mol s}^{-1} (\text{l mito})^{-1}$                      | (5)       |
| $X_{ndk}$                            | Nucleoside diphosphokinase activity                                           | $2.65 \times 10^{-2}$ | $\text{mol s}^{-1} (\text{l mito volume})^{-1}$               | (5)       |
| $X_{got}$                            | Glutamate oxaloacetate transaminase                                           | 7.96                  | $\text{mol s}^{-1} (\text{l mito})^{-1}$                      | (5)       |
| $X_{PYRH}$                           | PYR/H <sup>+</sup> co-transporter activity                                    | $4.12 \times 10^8$    | $\text{mol s}^{-1} \text{M}^{-2} (\text{l mito})^{-1}$        | (5)       |
| $X_{GLUH}$                           | GLU/H <sup>+</sup> co-transporter activity                                    | $3.26 \times 10^8$    | $\text{mol s}^{-1} \text{M}^{-2} (\text{l mito volume})^{-1}$ | (5)       |
| $X_{CITMAL}$                         | HCIT <sup>2-</sup> /MAL <sup>2-</sup> antiporter activity                     | $7.31 \times 10^1$    | $\text{mol s}^{-1} \text{M}^{-2} (\text{l mito volume})^{-1}$ | (5)       |
| $X_{AKGMAL}$                         | AKG <sup>2-</sup> /MAL <sup>2-</sup> antiporter activity                      | $3.46 \times 10^{-1}$ | $\text{mol s}^{-1} (\text{l mito volume})^{-1}$               | (5)       |
| $X_{SUCMAL}$                         | SUC <sup>2-</sup> /MAL <sup>2-</sup> antiporter activity                      | $9.54 \times 10^1$    | $\text{mol s}^{-1} \text{M}^{-2} (\text{l mito})^{-1}$        | (5)       |
| $X_{MALPI}$                          | MAL <sup>2-</sup> /PI <sup>2-</sup> antiporter activity                       | $1.58 \times 10^1$    | $\text{mol s}^{-1} \text{M}^{-2} (\text{l mito})^{-1}$        | (5)       |
| $X_{ASPGLU}$                         | ASP <sup>-</sup> /HGLU <sup>0</sup> antiporter activity                       | $7.48 \times 10^{-5}$ | $\text{mol s}^{-1} (\text{l mito})^{-1}$                      | (5)       |
| $X_{C1}$                             | Complex I activity                                                            | $2.47 \times 10^4$    | $\text{mol s}^{-1} \text{M}^{-2} (\text{l mito})^{-1}$        | (5)       |
| $X_{C3}$                             | Complex III activity                                                          | $6.65 \times 10^{-1}$ | $\text{mol s}^{-1} \text{M}^{-3/2} (\text{l mito})^{-1}$      | (5)       |

|            |                                                               |                       |                                                                       |     |
|------------|---------------------------------------------------------------|-----------------------|-----------------------------------------------------------------------|-----|
| $k_{PI,1}$ | Complex III/PI parameter                                      | $2.81 \times 10^{-5}$ | M                                                                     | (5) |
| $k_{PI,2}$ | Complex III/PI parameter                                      | $3.14 \times 10^{-3}$ | M                                                                     | (5) |
| $X_{C4}$   | Complex IV activity                                           | $9.93 \times 10^{-5}$ | $\text{mol s}^{-1} \text{M}^{-1} (\text{l mito})^{-1}$                | (5) |
| $X_{F1}$   | $F_0F_1$ -ATPase activity                                     | $5.95 \times 10^3$    | $\text{mol s}^{-1} \text{M}^{-1} (\text{l mito})^{-1}$                | (5) |
| $X_{ANT}$  | ANT activity                                                  | $1.52 \times 10^{-1}$ | unitless                                                              | (1) |
| $X_{PIHt}$ | $\text{H}_2\text{PO}_4^-/\text{H}^+$ co-transporter activity  | $2.01 \times 10^7$    | $\text{mol s}^{-1} \text{M}^{-1} (\text{l mito})^{-1}$                | (5) |
| $k_{PIHt}$ | $\text{H}_2\text{PO}_4^-/\text{H}^+$ co-transporter parameter | $1.01 \times 10^{-3}$ | M                                                                     | (5) |
| $X_{KH}$   | $\text{K}^+/\text{H}^+$ antiporter activity                   | $5.65 \times 10^6$    | $\text{mol s}^{-1} \text{M}^{-2} (\text{l mito})^{-1}$                | (5) |
| $X_{Hle}$  | Proton leak activity                                          | $3.05 \times 10^2$    | $\text{mol s}^{-1} \text{mV}^{-1} \text{M}^{-1} (\text{l mito})^{-1}$ | (5) |
| $X_{AKi}$  | IM space adenylate kinase activity                            | $1 \times 10^{10}$    | $\text{mol s}^{-1} \text{M}^{-2} (\text{l mito})^{-1}$                | -   |
| $X_{AKc}$  | Cytoplasmic adenylate kinase activity                         | $1 \times 10^{10}$    | $\text{mol s}^{-1} \text{M}^{-2} (\text{l cyto})^{-1}$                | -   |
| $X_{CKc}$  | Cytoplasmic creatine kinase                                   | $1 \times 10^{10}$    | $\text{mol s}^{-1} \text{M}^{-2} (\text{l cyto})^{-1}$                | -   |

#### Oxygen Transport Parameters

|                    |                                             |                       |                                            |          |
|--------------------|---------------------------------------------|-----------------------|--------------------------------------------|----------|
| $\alpha_1$         | Plasma $\text{O}_2$ solubility              | $1.30 \times 10^{-6}$ | $\text{M mm Hg}^{-1}$                      | (9)      |
| $\alpha_2$         | Interstitial fluid $\text{O}_2$ solubility  | $1.25 \times 10^{-6}$ | $\text{M mm Hg}^{-1}$                      | (10)     |
| $\alpha_3$         | Myocyte $\text{O}_2$ solubility             | $1.74 \times 10^{-6}$ | $\text{M mm Hg}^{-1}$                      | (11)     |
| $PS_{12}$          | Capillary wall PS product                   | 50                    | $\text{ml s}^{-1} (\text{ml tissue})^{-1}$ | (12, 13) |
| $PS_{23}$          | Myocyte fiber PS product                    | 10                    | $\text{ml s}^{-1} (\text{ml tissue})^{-1}$ | (14)     |
| $Hct$              | Hematocrit                                  | 0.45                  | unitless                                   | (2)      |
| $C_{Hb}$           | Oxyhemoglobin binding site concentration    | 0.0213                | $\text{mol (l RBC)}^{-1}$                  | (9)      |
| $P_{50,Hb}$        | Hemoglobin half-saturation $P_{\text{O}_2}$ | 30.0                  | mm Hg                                      | (15)     |
| $n_H$              | Hemoglobin Hill coefficient                 | 2.55                  | unitless                                   | (15)     |
| $C_{Mb}$           | Myoglobin saturation                        | $200 \times 10^{-6}$  | $\text{mol (l cell)}^{-1}$                 | (2)      |
| $P_{50,Mb}$        | Myoglobin half-saturation $P_{\text{O}_2}$  | 2.39                  | mm Hg                                      | (16)     |
| $P_{\text{input}}$ | Arterial oxygen tension                     | 100                   | mm Hg                                      | (2)      |

#### Physicochemical Parameters:

|      |                                |          |                                     |                |
|------|--------------------------------|----------|-------------------------------------|----------------|
| $RT$ | Gas constant times temperature | 2.5775   | $\text{kJ mol}^{-1}$                | - <sup>a</sup> |
| $F$  | Faraday's constant             | 0.096484 | $\text{kJ mol}^{-1} \text{mV}^{-1}$ | - <sup>a</sup> |

#### Structure/Volume Parameters:

|        |                  |       |                             |      |
|--------|------------------|-------|-----------------------------|------|
| $\rho$ | Tissue density   | 1.053 | $\text{g (ml tissue)}^{-1}$ | (4)  |
| $L$    | Capillary length | 550   | $\mu\text{m}$               | (17) |



|                                               |                                                                        |                       |                                             |                       |
|-----------------------------------------------|------------------------------------------------------------------------|-----------------------|---------------------------------------------|-----------------------|
| $V_1$                                         | Capillary blood volume                                                 | 0.05                  | ml (ml tissue) <sup>-1</sup>                | (18, 19)              |
| $V_2$                                         | Interstitial volume                                                    | 0.17585               | ml (ml tissue) <sup>-1</sup>                | (4)                   |
| $V_3$                                         | Myocyte volume                                                         | 0.73078               | ml (ml tissue) <sup>-1</sup>                | (4)                   |
| $V_{\text{cyto}}$                             | Cytoplasm Volume                                                       | 0.894                 | (l cytoplasm) (l cell) <sup>-1</sup>        | (20)                  |
| $V_{\text{mito}}$                             | Mitochondrial Volume                                                   | 0.056                 | (l mito) (l cell) <sup>-1</sup>             | (21)                  |
| $W_x$                                         | Matrix water space fraction                                            | 0.6514                | (l water) (l mito) <sup>-1</sup>            | (4, 22)               |
| $W_i$                                         | IM space water fraction                                                | 0.0724                | (l water) (l mito) <sup>-1</sup>            | (4, 22)               |
| $W_c$                                         | Cytoplasm water fraction                                               | 0.8425                | (l water) (l cyto) <sup>-1</sup>            | (4)                   |
| $\gamma$                                      | Outer membrane area per mito volume                                    | 5.99                  | $\mu\text{m}^{-1}$                          | (23)                  |
| $\rho_m$                                      | Protein density of mitochondria                                        | $2.725 \times 10^5$   | (mg Protein) (l mito) <sup>-1</sup>         | (4)                   |
| Mitochondrial Model Parameters:               |                                                                        |                       |                                             |                       |
| $n_A$                                         | H <sup>+</sup> stoich. coef. for F <sub>1</sub> F <sub>0</sub> -ATPase | 3                     | unitless                                    | (24)                  |
| $p_{\text{PI}}$                               | Mitochondrial membrane permeability to inorganic phosphate             | 327                   | $\mu\text{m sec}^{-1}$                      | (25)                  |
| $p_A$                                         | Mitochondrial outer membrane permeability to nucleotides               | 85.0                  | $\mu\text{m sec}^{-1}$                      | (26)                  |
| $k_{\text{O}_2}$                              | Kinetic constant for complex IV                                        | $1.2 \times 10^{-4}$  | M                                           | (25) <sup>d</sup>     |
| $C_{\text{IM}}$                               | Capacitance of inner membrane                                          | $6.75 \times 10^{-6}$ | mol (l mito) <sup>-1</sup> mV <sup>-1</sup> | (22, 27)              |
| $B_x$                                         | Matrix buffering parameter                                             | 0.02                  | M                                           | (28, 29) <sup>b</sup> |
| $K_{Bx}$                                      | Matrix buffering parameter                                             | $1 \times 10^{-7}$    | M                                           | (28, 29) <sup>b</sup> |
| Fixed Concentrations and Concentration Pools: |                                                                        |                       |                                             |                       |
| $\text{NAD}_{\text{tot}}$                     | Total matrix NAD(H) concentration                                      | 2.97                  | mol (l matrix water) <sup>-1</sup>          | (25) <sup>c</sup>     |
| $Q_{\text{tot}}$                              | Total matrix ubiquinol concentration                                   | 1.35                  | mol (l matrix water) <sup>-1</sup>          | (25) <sup>c</sup>     |
| $\text{cyt}C_{\text{tot}}$                    | Total IM cytochrome c concentration                                    | 2.70                  | mol (l IM water) <sup>-1</sup>              | (25) <sup>c</sup>     |
| $A_{\text{tot}}$                              | Total matrix ATP+ADP concentration                                     | 10                    | mol (l matrix water) <sup>-1</sup>          | (25) <sup>c</sup>     |
| $\text{CR}_{\text{tot}}$                      | Total Cr+CrP concentration                                             | 42.7                  | mol (l cytoplasm water) <sup>-1</sup>       | (30)                  |
| $[\text{CO}_2\text{tot}]_x$                   | Total CO <sub>2</sub> concentration in the matrix                      | $21.4 \times 10^{-3}$ | Molar                                       | (31)                  |

Standard Gibbs Free Energy or Equilibrium Constants of Reference Reactions:<sup>d</sup>

|                        |                                       |                       |                      |     |
|------------------------|---------------------------------------|-----------------------|----------------------|-----|
| $\Delta_r G_{C1}^0$    | Complex I                             | -109.7                | kJ mol <sup>-1</sup> | (5) |
| $\Delta_r G_{C3}^0$    | Complex III                           | 46.69                 | kJ mol <sup>-1</sup> | (5) |
| $\Delta_r G_{C4}^0$    | Complex IV                            | -202.2                | kJ mol <sup>-1</sup> | (5) |
| $\Delta_r G_{F1}^0$    | F <sub>0</sub> F <sub>1</sub> -ATPase | -4.51                 | kJ mol <sup>-1</sup> | (5) |
| $\Delta_r G_{pdh}^0$   | Pyruvate dehydrogenase                | 19.59                 | kJ mol <sup>-1</sup> | (5) |
| $\Delta_r G_{cits}^0$  | Citrate synthase                      | 42.36                 | kJ mol <sup>-1</sup> | (5) |
| $\Delta_r G_{acon}^0$  | Aconitase                             | 12.82                 | kJ mol <sup>-1</sup> | (5) |
| $\Delta_r G_{isod}^0$  | Isocitrate dehydrogenase              | 91.75                 | kJ mol <sup>-1</sup> | (5) |
| $\Delta_r G_{akgd}^0$  | $\alpha$ -Ketoglutarate dehydrogenase | 12.82                 | kJ mol <sup>-1</sup> | (5) |
| $\Delta_r G_{scoas}^0$ | Succinyl-CoA synthetase               | 47.61                 | kJ mol <sup>-1</sup> | (5) |
| $\Delta_r G_{sdh}^0$   | Succinate dehydrogenase               | -1.35                 | kJ mol <sup>-1</sup> | (5) |
| $\Delta_r G_{fum}^0$   | Fumarase                              | -3.60                 | kJ mol <sup>-1</sup> | (5) |
| $\Delta_r G_{mdh}^0$   | Malate dehydrogenase                  | 69.12                 | kJ mol <sup>-1</sup> | (5) |
| $\Delta_r G_{ndk}^0$   | Nucleoside diphosphokinase            | 0                     | kJ mol <sup>-1</sup> | (5) |
| $\Delta_r G_{got}^0$   | Glutamate Oxaloacetate Transaminase   | -1.47                 | kJ mol <sup>-1</sup> | (5) |
| $K_{eq,AK}^o$          | Adenylate kinase                      | $3.97 \times 10^{-1}$ | unitless             | (1) |
| $K_{eq,CK}^o$          | Creatine kinase                       | $3.57 \times 10^8$    | M <sup>-1</sup>      | (1) |

<sup>a</sup>Standard physicochemical constants

<sup>b</sup>Values are adjusted to match experimental data.

<sup>c</sup>Value used is taken from previous modeling studies, not direct experimental measure.

<sup>d</sup>Values used are calculated for reference reactions at physiological temperature (310.15 K) and ionic strength (0.17 M) based on standard thermodynamic data collected from the Alberty's book (32) and NIST database (33). Please refer to Appendices of (5) and (1) for detailed computation procedures.

## S2. Computational model

The model is mathematically described by using the differential equations listed below. The oxidative phosphorylation component of the model is derived from previously published work (22, 34, 35). The details behind the TCA cycle enzyme kinetic schemes are provided in Appendix C of our previously published work (5). Here the subscripts “x”, “i”, and “c” on variable names denote matrix, intermembrane, and cytoplasmic (extra-mitochondrial) spaces, respectively. For example  $[ATP]_x$  denotes matrix ATP concentration while  $[ATP]_c$  denotes ATP concentration in the cytoplasm or buffer space for an isolated mitochondria experiment.

### S2.1. Differential equations

The differential equations are grouped into equations for oxygen concentration, membrane potential, mitochondrial matrix variables, intermembrane space variables, and cytoplasm variables. The time derivatives of free  $[H^+]$ ,  $[Mg^{2+}]$ , and  $[K^+]$  are treated separately.

#### Oxygen concentration:

$$\partial C_{O_2, \text{capillary}} / \partial t = -\frac{\rho GL}{V_1} \partial C_{O_2, \text{capillary}} / \partial x - \frac{\alpha_1 PS_{12}}{V_1} (P_{O_2, \text{capillary}} - P_{O_2, \text{interstitium}}) \quad (S1)$$

$$\partial C_{O_2, \text{interstitium}} / \partial t = -\frac{\alpha_1 PS_{12}}{V_2} (P_{O_2, \text{capillary}} - P_{O_2, \text{interstitium}}) - \frac{\alpha_1 PS_{23}}{V_2} (P_{O_2, \text{interstitium}} - P_{O_2, \text{cell}}) \quad (S2)$$

$$\partial C_{O_2, \text{cell}} / \partial t = -\frac{\alpha_1 PS_{23}}{V_2} (P_{O_2, \text{capillary}} - P_{O_2, \text{cell}}) - V_{\text{mito}} \left( \frac{J_{C4}}{2} \right) \quad (S3)$$

where

$$C_{O_2, \text{capillary}} = \alpha_1 P_{O_2, \text{capillary}} + Hct C_{Hb} S_{Hb} \quad (S4)$$

$$S_{Hb} = \frac{P_{O_2, \text{capillary}}^{n_H}}{P_{O_2, \text{capillary}}^{n_H} + P_{50, Hb}^{n_H}} \quad (S5)$$

$$C_{O_2, \text{cell}} = \alpha_3 P_{O_2, \text{cell}} + C_{Mb} S_{Mb} \quad (S6)$$

$$S_{Mb} = \frac{P_{O_2, \text{cell}}}{P_{O_2, \text{cell}} + P_{50, Mb}} \quad (S7)$$

#### Mitochondrial Inner Membrane Electrical Potential:

$$\partial \Delta \Psi / \partial t = (+4J_{C1} + 2J_{C3} + 4J_{C4} - n_A J_{F1} - J_{ANT} - J_{Hle} + J_{ASPLU}) / C_{IM} \quad (S8)$$

#### Mitochondrial Matrix:

$$\partial [ATP]_x / \partial t = (+J_{ndk} + J_{F1} - J_{ANT}) / W_x \quad (S9)$$

$$\partial [ADP]_x / \partial t = (-J_{ndk} - J_{F1} + J_{ANT}) / W_x \quad (S10)$$

$$\partial [AMP]_x / \partial t = 0 / W_x \quad (S11)$$

$$\partial [GTP]_x / \partial t = (+J_{scoas} - J_{ndk}) / W_x \quad (S12)$$

$$d[\text{GDP}]_x / dt = (-J_{\text{scoas}} + J_{\text{ndk}}) / W_x \quad (\text{S13})$$

$$\partial[\text{PI}]_x / \partial t = (-J_{\text{scoas}} - J_{\text{F1}} + J_{\text{PIHt}} - J_{\text{SUCPI}} - J_{\text{MALPI}}) / W_x \quad (\text{S14})$$

$$\partial[\text{NADH}]_x / \partial t = (+J_{\text{pdh}} + J_{\text{isod}} + J_{\text{akgd}} + J_{\text{mdh}} - J_{\text{C1}}) / W_x \quad (\text{S15})$$

$$\partial[\text{QH}_2]_x / \partial t = (+J_{\text{sdh}} + J_{\text{C1}} - J_{\text{C3}}) / W_x \quad (\text{S16})$$

$$\partial[\text{PYR}]_x / \partial t = (-J_{\text{pdh}} + J_{\text{PYRH}}) / W_x \quad (\text{S17})$$

$$\partial[\text{ACCOA}]_x / \partial t = (-J_{\text{cits}} + J_{\text{pdh}}) / W_x \quad (\text{S18})$$

$$\partial[\text{CIT}]_x / \partial t = (+J_{\text{cits}} - J_{\text{acon}} + J_{\text{CITMAL}}) / W_x \quad (\text{S19})$$

$$\partial[\text{ICIT}]_x / \partial t = (+J_{\text{acon}} - J_{\text{isod}}) / W_x \quad (\text{S20})$$

$$\partial[\text{AKG}]_x / \partial t = (+J_{\text{isod}} - J_{\text{akgd}} - J_{\text{got}} + J_{\text{AKGMAL}}) / W_x \quad (\text{S21})$$

$$\partial[\text{SCOA}]_x / \partial t = (+J_{\text{akgd}} - J_{\text{scoas}}) / W_x \quad (\text{S22})$$

$$\partial[\text{COASH}]_x / \partial t = (-J_{\text{pdh}} - J_{\text{akgd}} + J_{\text{scoas}} + J_{\text{cits}}) / W_x \quad (\text{S23})$$

$$\partial[\text{SUC}]_x / \partial t = (+J_{\text{scoas}} - J_{\text{sdh}} + J_{\text{SUCPI}} - J_{\text{FUMSUC}}) / W_x \quad (\text{S24})$$

$$\partial[\text{FUM}]_x / \partial t = (+J_{\text{sdh}} - J_{\text{fum}} + J_{\text{FUMSUC}}) / W_x \quad (\text{S25})$$

$$\partial[\text{MAL}]_x / \partial t = (+J_{\text{fum}} - J_{\text{mdh}} + J_{\text{MALPI}} - J_{\text{AKGMAL}} - J_{\text{CITMAL}}) / W_x \quad (\text{S26})$$

$$\partial[\text{OAA}]_x / \partial t = (-J_{\text{cits}} + J_{\text{mdh}} + J_{\text{got}}) / W_x \quad (\text{S27})$$

$$\partial[\text{GLU}]_x / \partial t = (+J_{\text{got}} + J_{\text{GLUH}} - J_{\text{ASPLU}}) / W_x \quad (\text{S28})$$

$$\partial[\text{ASP}]_x / \partial t = (-J_{\text{got}} + J_{\text{ASPLU}}) / W_x \quad (\text{S29})$$

$$\partial[\text{CO}_2\text{tot}]_x / \partial t = 0 / W_x. \quad (\text{S30})$$

### Mitochondrial Inter-Membrane Space:

$$\partial[\text{Cred}]_i / \partial t = (+2J_{\text{C3}} - 2J_{\text{C4}}) / W_i \quad (\text{S31})$$

$$\partial[\text{ATP}]_i / \partial t = (+J_{\text{ATP}} + J_{\text{ANT}} + J_{\text{AKi}}) / W_i \quad (\text{S32})$$

$$\partial[\text{ADP}]_i / \partial t = (+J_{\text{ADP}} - J_{\text{ANT}} - 2J_{\text{AKi}}) / W_i \quad (\text{S33})$$

$$\partial[\text{AMP}]_i / \partial t = (J_{\text{AMPt}} + J_{\text{AKi}}) / W_i \quad (\text{S34})$$

$$\partial[\text{PI}]_i / \partial t = (-J_{\text{PIHt}} + J_{\text{Pit}} + J_{\text{MALPI}} + J_{\text{SUCPI}}) / W_i \quad (\text{S35})$$

$$\partial[\text{PYR}]_i / \partial t = (-J_{\text{PYRH}} + J_{\text{PYRt}}) / W_i \quad (\text{S36})$$

$$\partial[\text{CIT}]_i / \partial t = (-J_{\text{CITMAL}} + J_{\text{CITt}}) / W_i \quad (\text{S37})$$

$$\partial[\text{ICIT}]_i / \partial t = (-J_{\text{ICITMAL}} + J_{\text{ICITt}}) / W_i \quad (\text{S38})$$

$$\partial[\text{AKG}]_i / \partial t = (-J_{\text{AKGMAL}} + J_{\text{AKGt}}) / W_i \quad (\text{S39})$$

$$\partial[\text{SUC}]_i / \partial t = (-J_{\text{SUCPI}} + J_{\text{SUCt}} + J_{\text{FUMSUC}}) / W_i \quad (\text{S40})$$

$$\partial[\text{FUM}]_i / \partial t = (-J_{\text{FUMPI}} + J_{\text{FUMt}}) / W_i \quad (\text{S41})$$

$$\partial[\text{MAL}]_i / \partial t = (-J_{\text{MALPI}} + J_{\text{MALt}} + J_{\text{AKGMAL}} + J_{\text{CITMAL}}) / W_i \quad (\text{S42})$$

$$\partial[\text{GLU}]_i / \partial t = (-J_{\text{GLUH}} + J_{\text{ASPLU}} + J_{\text{GLUt}}) / W_i \quad (\text{S43})$$

$$\partial[\text{ASP}]_i / \partial t = (-J_{\text{ASPLU}} + J_{\text{ASPt}}) / W_i. \quad (\text{S44})$$

Cytoplasm:

$$\partial[\text{ATP}]_c / \partial t = (- (V_{\text{cyto}} / V_{\text{mito}}) J_{\text{ATPt}} - J_{\text{ATPase}} + J_{\text{CKc}} + J_{\text{AKc}}) / W_c \quad (\text{S45})$$

$$\partial[\text{ADP}]_c / \partial t = (- (V_{\text{cyto}} / V_{\text{mito}}) J_{\text{ADPt}} + J_{\text{ATPase}} - J_{\text{CKc}} - 2J_{\text{AKc}}) / W_c \quad (\text{S46})$$

$$\partial[\text{AMP}]_c / \partial t = (- (V_{\text{cyto}} / V_{\text{mito}}) J_{\text{AMPt}} + J_{\text{AKc}}) / W_c \quad (\text{S47})$$

$$\partial[\text{PI}]_c / \partial t = (- (V_{\text{cyto}} / V_{\text{mito}}) J_{\text{PIt}} + J_{\text{AKc}}) / W_c \quad (\text{S48})$$

$$\partial[\text{PYR}]_c / \partial t = - (V_{\text{cyto}} / V_{\text{mito}}) J_{\text{PYRt}} / W_c \quad (\text{S49})$$

$$\partial[\text{CIT}]_c / \partial t = - (V_{\text{cyto}} / V_{\text{mito}}) J_{\text{CITt}} / W_c \quad (\text{S50})$$

$$\partial[\text{AKG}]_c / \partial t = - (V_{\text{cyto}} / V_{\text{mito}}) J_{\text{AKGt}} / W_c \quad (\text{S51})$$

$$\partial[\text{SUC}]_c / \partial t = - (V_{\text{cyto}} / V_{\text{mito}}) J_{\text{SUCt}} / W_c \quad (\text{S52})$$

$$\partial[\text{FUM}]_c / \partial t = - (V_{\text{cyto}} / V_{\text{mito}}) J_{\text{FUMt}} / W_c \quad (\text{S53})$$

$$\partial[\text{MAL}]_c / \partial t = - (V_{\text{cyto}} / V_{\text{mito}}) J_{\text{MALt}} / W_c \quad (\text{S54})$$

$$\partial[\text{GLU}]_c / \partial t = - (V_{\text{cyto}} / V_{\text{mito}}) J_{\text{GLUt}} / W_c \quad (\text{S55})$$

$$\partial[\text{ASP}]_c / \partial t = - (V_{\text{cyto}} / V_{\text{mito}}) J_{\text{ASPt}} / W_c \quad (\text{S56})$$

$$\partial[\text{PCr}]_c / \partial t = - J_{\text{CKc}} / W_c. \quad (\text{S57})$$

Assuming constant total concentrations  $\text{NAD}_{\text{tot}}$ ,  $\text{Q}_{\text{tot}}$ ,  $\text{cytC}_{\text{tot}}$ , and  $\text{A}_{\text{tot}}$  for nicotinamide nucleotides, ubiquinol, and cytochrome c, we compute concentrations of the following reactants as:

$$[\text{NAD}]_x = \text{NAD}_{\text{tot}} - [\text{NADH}]_x \quad (\text{S58})$$

$$[\text{COQ}]_x = \text{Q}_{\text{tot}} - [\text{QH}_2]_x \quad (\text{S59})$$

$$[\text{Cox}]_i = \text{cytC}_{\text{tot}} - [\text{Cred}]_i. \quad (\text{S60})$$

Concentrations of cytoplasmic  $\text{H}^+$ ,  $\text{Mg}^{2+}$ , and  $\text{K}^+$  are assumed to be fixed at buffer conditions or physiological in vivo values. Since the outer membrane is highly permeable to hydrogen ions and cations, we assume here  $[\text{H}^+]_i = [\text{H}^+]_c$ ,  $[\text{Mg}^{2+}]_i = [\text{Mg}^{2+}]_c$ , and  $[\text{K}^+]_i = [\text{K}^+]_c$ .

The rate of change of free  $[\text{H}^+]$ ,  $[\text{Mg}^{2+}]$  and  $[\text{K}^+]$  in the mitochondrial matrix can be calculated based on mass conservation. Mathematical expressions for time derivatives of  $[\text{H}^+]$ ,  $[\text{Mg}^{2+}]$ , and  $[\text{K}^+]$  are listed below. For detailed description and derivation of these expressions, please refer to Chapter 6 of Beard and Qian (36).

$$\begin{aligned}
\frac{\partial[\text{H}^+]}{\partial t} = & \left[ \left( \frac{\partial[\text{K}_{bound}]}{\partial[\text{Mg}^{2+}]} \cdot \frac{\partial[\text{Mg}_{bound}]}{\partial[\text{K}^+]} - \alpha_{\text{Mg}} \alpha_{\text{K}} \right) \Phi^{\text{H}} \right. \\
& + \left( \alpha_{\text{K}} \frac{\partial[\text{H}_{bound}]}{\partial[\text{Mg}^{2+}]} - \frac{\partial[\text{H}_{bound}]}{\partial[\text{K}^+]} \cdot \frac{\partial[\text{K}_{bound}]}{\partial[\text{Mg}^{2+}]} \right) \Phi^{\text{Mg}} \\
& \left. + \left( \alpha_{\text{Mg}} \frac{\partial[\text{H}_{bound}]}{\partial[\text{K}^+]} - \frac{\partial[\text{H}_{bound}]}{\partial[\text{Mg}^{2+}]} \cdot \frac{\partial[\text{Mg}_{bound}]}{\partial[\text{K}^+]} \right) \Phi^{\text{K}} \right] / D
\end{aligned} \tag{S61}$$

$$\begin{aligned}
\frac{\partial[\text{Mg}^{2+}]}{\partial t} = & \left[ \left( \alpha_{\text{K}} \frac{\partial[\text{Mg}_{bound}]}{\partial[\text{H}^+]} - \frac{\partial[\text{K}_{bound}]}{\partial[\text{H}^+]} \cdot \frac{\partial[\text{Mg}_{bound}]}{\partial[\text{K}^+]} \right) \Phi^{\text{H}} \right. \\
& + \left( \frac{\partial[\text{K}_{bound}]}{\partial[\text{H}^+]} \cdot \frac{\partial[\text{H}_{bound}]}{\partial[\text{K}^+]} - \alpha_{\text{H}} \alpha_{\text{K}} \right) \Phi^{\text{Mg}} \\
& \left. + \left( \alpha_{\text{H}} \frac{\partial[\text{Mg}_{bound}]}{\partial[\text{K}^+]} - \frac{\partial[\text{H}_{bound}]}{\partial[\text{K}^+]} \cdot \frac{\partial[\text{Mg}_{bound}]}{\partial[\text{H}^+]} \right) \Phi^{\text{K}} \right] / D
\end{aligned} \tag{S62}$$

$$\begin{aligned}
\frac{\partial[\text{K}^+]}{\partial t} = & \left[ \left( \alpha_{\text{Mg}} \frac{\partial[\text{K}_{bound}]}{\partial[\text{H}^+]} - \frac{\partial[\text{K}_{bound}]}{\partial[\text{Mg}^{2+}]} \cdot \frac{\partial[\text{Mg}_{bound}]}{\partial[\text{H}^+]} \right) \Phi^{\text{H}} \right. \\
& + \left( \alpha_{\text{H}} \frac{\partial[\text{K}_{bound}]}{\partial[\text{Mg}^{2+}]} - \frac{\partial[\text{K}_{bound}]}{\partial[\text{H}^+]} \cdot \frac{\partial[\text{H}_{bound}]}{\partial[\text{Mg}^{2+}]} \right) \Phi^{\text{Mg}} \\
& \left. + \left( \frac{\partial[\text{Mg}_{bound}]}{\partial[\text{H}^+]} \cdot \frac{\partial[\text{H}_{bound}]}{\partial[\text{Mg}^{2+}]} - \alpha_{\text{H}} \alpha_{\text{Mg}} \right) \Phi^{\text{K}} \right] / D
\end{aligned} \tag{S63}$$

The binding polynomials are calculated as

$$P_i([\text{H}^+], [\text{Mg}^{2+}], [\text{K}^+]) = 1 + [\text{H}^+] / K_i^{\text{H}} + [\text{Mg}^{2+}] / K_i^{\text{Mg}} + [\text{K}^+] / K_i^{\text{K}}. \tag{S64}$$

The partial derivatives of total concentrations of bound  $[\text{H}^+]$ ,  $[\text{Mg}^{2+}]$ , and  $[\text{K}^+]$  are expressed as:

$$\frac{\partial[\text{H}_{bound}]}{\partial[\text{Mg}^{2+}]} = - \sum_{i=1}^{N_r} \frac{[\text{L}_i][\text{H}^+] / K_i^{\text{H}}}{K_i^{\text{Mg}} (P_i([\text{H}^+], [\text{Mg}^{2+}], [\text{K}^+]))^2} \tag{S65}$$

$$\frac{\partial[\text{H}_{bound}]}{\partial[\text{K}^+]} = - \sum_{i=1}^{N_r} \frac{[\text{L}_i][\text{H}^+] / K_i^{\text{H}}}{K_i^{\text{K}} (P_i([\text{H}^+], [\text{Mg}^{2+}], [\text{K}^+]))^2} \tag{S66}$$

$$\frac{\partial[\text{H}_{bound}]}{\partial[\text{H}^+]} = \sum_{i=1}^{N_r} \frac{[\text{L}_i] (1 + [\text{Mg}^{2+}] / K_i^{\text{Mg}} + [\text{K}^+] / K_i^{\text{K}})}{K_i^{\text{H}} (P_i([\text{H}^+], [\text{Mg}^{2+}], [\text{K}^+]))^2} \tag{S67}$$

$$\frac{\partial[\text{Mg}_{bound}]}{\partial[\text{H}^+]} = - \sum_{i=1}^{N_r} \frac{[\text{L}_i][\text{Mg}^{2+}] / K_i^{\text{Mg}}}{K_i^{\text{H}} (P_i([\text{H}^+], [\text{Mg}^{2+}], [\text{K}^+]))^2} \tag{S68}$$

$$\frac{\partial[\text{Mg}_{bound}]}{\partial[\text{K}^+]} = -\sum_{i=1}^{N_r} \frac{[\text{L}_i][\text{Mg}^{2+}]/K_i^{\text{Mg}}}{K_i^K (P_i([\text{H}^+], [\text{Mg}^{2+}], [\text{K}^+]))^2} \quad (\text{S69})$$

$$\frac{\partial[\text{Mg}_{bound}]}{\partial[\text{Mg}^{2+}]} = \sum_{i=1}^{N_r} \frac{[\text{L}_i](1 + [\text{H}^+]/K_i^{\text{H}} + [\text{K}^+]/K_i^K)}{K_i^{\text{Mg}} (P_i([\text{H}^+], [\text{Mg}^{2+}], [\text{K}^+]))^2} \quad (\text{S70})$$

$$\frac{\partial[\text{K}_{bound}]}{\partial[\text{H}^+]} = -\sum_{i=1}^{N_r} \frac{[\text{L}_i][\text{K}^+]/K_i^K}{K_i^{\text{H}} (P_i([\text{H}^+], [\text{Mg}^{2+}], [\text{K}^+]))^2} \quad (\text{S71})$$

$$\frac{\partial[\text{K}_{bound}]}{\partial[\text{Mg}^{2+}]} = -\sum_{i=1}^{N_r} \frac{[\text{L}_i][\text{K}^+]/K_i^K}{K_i^{\text{Mg}} (P_i([\text{H}^+], [\text{Mg}^{2+}], [\text{K}^+]))^2} \quad (\text{S72})$$

$$\frac{\partial[\text{K}_{bound}]}{\partial[\text{K}^+]} = \sum_{i=1}^{N_r} \frac{[\text{L}_i](1 + [\text{H}^+]/K_i^{\text{H}} + [\text{Mg}^{2+}]/K_i^{\text{Mg}})}{K_i^K (P_i([\text{H}^+], [\text{Mg}^{2+}], [\text{K}^+]))^2}. \quad (\text{S73})$$

The flux terms for  $\text{H}^+$ ,  $\text{Mg}^{2+}$ , and  $\text{K}^+$  are:

$$\Phi^{\text{H}} = -\sum_{i=1}^{N_r} \frac{\partial[\text{H}_{bound}]}{\partial[\text{L}_i]} \frac{d[\text{L}_i]}{dt} + \sum_{k=1}^{N_f} n_k J_k + J_t^{\text{H}} \quad (\text{S74})$$

$$\Phi^{\text{Mg}} = -\sum_{i=1}^{N_r} \frac{\partial[\text{Mg}_{bound}]}{\partial[\text{L}_i]} \frac{d[\text{L}_i]}{dt} + J_t^{\text{Mg}} \quad (\text{S75})$$

$$\Phi^{\text{K}} = -\sum_{i=1}^{N_r} \frac{\partial[\text{K}_{bound}]}{\partial[\text{L}_i]} \frac{d[\text{L}_i]}{dt} + J_t^{\text{K}}. \quad (\text{S76})$$

where  $N_r$  is the number of reactants,  $N_f$  is the number of reactions,  $n_k$  is the stoichiometric coefficient of  $k^{\text{th}}$  reaction,  $J_k$  is the flux of  $k^{\text{th}}$  reaction,  $J_t^{\text{H}}$  ( $J_t^{\text{Mg}}$ ,  $J_t^{\text{K}}$ ) is the transport flux of  $[\text{H}^+]$  ( $[\text{Mg}^{2+}]$ ,  $[\text{K}^+]$ ) into the system. In the current model, for the mitochondrial matrix, we have

$$\sum_{k=1}^{N_f} n_k J_k = (-J_{\text{pdh}} + 2J_{\text{cits}} - J_{\text{akgd}} + J_{\text{scoas}} + J_{\text{mdh}})/W_x \quad (\text{S77})$$

$$J_t^{\text{H}} = (J_{\text{PYRH}} + J_{\text{GLUH}} + J_{\text{CITMAL}} - J_{\text{ASPLU}} - 5J_{\text{C1}} - 2J_{\text{C3}} - 4J_{\text{C4}} + (n_A - 1)J_{\text{F1}} + 2J_{\text{PIHt}} + J_{\text{Hle}} - J_{\text{KH}})/W_x \quad (\text{S78})$$

$$J_t^{\text{Mg}} = 0 \quad (\text{S79})$$

$$J_t^{\text{K}} = J_{\text{KH}}/W_x. \quad (\text{S80})$$

The buffering terms are:

$$\alpha_{\text{H}} = 1 + \frac{\partial[\text{H}_{bound}]}{\partial[\text{H}^+]} + \frac{B_x}{K_{\text{Bx}}(1 + [\text{H}^+]/K_{\text{Bx}})^2} \quad (\text{S81})$$

$$\alpha_{\text{Mg}} = 1 + \frac{\partial[\text{Mg}_{bound}]}{\partial[\text{Mg}^{2+}]} \quad (\text{S82})$$

$$\alpha_K = 1 + \frac{\partial[\mathbf{K}_{bound}]}{\partial[\mathbf{K}^+]} \quad (\text{S83})$$

The denominator term in the time derivatives of  $[\mathbf{H}^+]$ ,  $[\mathbf{Mg}^{2+}]$ , and  $[\mathbf{K}^+]$  is:

$$\begin{aligned} D = & \alpha_H \frac{\partial[\mathbf{K}_{bound}]}{\partial[\mathbf{Mg}^{2+}]} \cdot \frac{\partial[\mathbf{Mg}_{bound}]}{\partial[\mathbf{K}^+]} + \alpha_K \frac{\partial[\mathbf{H}_{bound}]}{\partial[\mathbf{Mg}^{2+}]} \cdot \frac{\partial[\mathbf{Mg}_{bound}]}{\partial[\mathbf{H}^+]} \\ & + \alpha_{Mg} \frac{\partial[\mathbf{H}_{bound}]}{\partial[\mathbf{K}^+]} \cdot \frac{\partial[\mathbf{K}_{bound}]}{\partial[\mathbf{H}^+]} - \alpha_{Mg} \alpha_K \alpha_H \\ & - \frac{\partial[\mathbf{H}_{bound}]}{\partial[\mathbf{K}^+]} \cdot \frac{\partial[\mathbf{K}_{bound}]}{\partial[\mathbf{Mg}^{2+}]} \cdot \frac{\partial[\mathbf{Mg}_{bound}]}{\partial[\mathbf{H}^+]} \\ & - \frac{\partial[\mathbf{H}_{bound}]}{\partial[\mathbf{Mg}^{2+}]} \cdot \frac{\partial[\mathbf{Mg}_{bound}]}{\partial[\mathbf{K}^+]} \cdot \frac{\partial[\mathbf{K}_{bound}]}{\partial[\mathbf{H}^+]} \end{aligned} \quad (\text{S84})$$

## S2.2. Flux expressions

### Mathematical expressions for oxidative phosphorylation fluxes

Complex I flux:

$$J_{C1} = X_{C1} \left( K_{eq,C1} [\mathbf{NADH}]_x [\mathbf{COQ}]_x - [\mathbf{NAD}]_x [\mathbf{QH}_2]_x \right), \quad (\text{S85})$$

where  $K_{eq,C1} = K_{eq,C1}^0 \cdot [\mathbf{H}^+]_x^5 / [\mathbf{H}^+]_i^4$ , with  $K_{eq,C1}^0 = \exp\left(-(\Delta_r G_{C1}^0 + 4F\Delta\Psi) / RT\right)$  and  $\Delta_r G_{C1}^0 = \Delta_f G_{\text{NAD}}^0 + \Delta_f G_{\text{QH}_2}^0 - \Delta_r G_{\text{NADH}}^0 - \Delta_r G_{\text{COQ}}^0 = -109.7 \text{ kJ/mol}$ .

Complex III flux:

$$J_{C3} = X_{C3} \left( \frac{1 + [\mathbf{PI}]_x / k_{PI,3}}{1 + [\mathbf{PI}]_x / k_{PI,4}} \right) \left( K_{eq,C3}^{1/2} [\mathbf{Cox}]_i [\mathbf{QH}_2]_x^{1/2} - [\mathbf{Cred}]_i [\mathbf{COQ}]_x^{1/2} \right), \quad (\text{S86})$$

where  $K_{eq,C3} = K_{eq,C3}^0 \cdot [\mathbf{H}^+]_x^2 / [\mathbf{H}^+]_i^4$ , with  $K_{eq,C3}^0 = \exp\left(-(\Delta_r G_{C3}^0 + 2F\Delta\Psi) / RT\right)$  and  $\Delta_r G_{C3}^0 = \Delta_f G_{\text{Cred}}^0 + \Delta_f G_{\text{COQ}}^0 - \Delta_r G_{\text{QH}_2}^0 - \Delta_r G_{\text{Cox}}^0 = 46.69 \text{ kJ/mol}$ .

Complex IV flux:

$$J_{C4} = X_{C4} \left( \frac{1}{1 + k_{O_2} / [\mathbf{O}_2]} \right) \exp\left(\frac{F\Delta\Psi}{RT}\right) \left( \frac{[\mathbf{Cred}]_i}{\text{cytC}_{\text{tot}}} \right) \left( K_{eq,C4}^{1/2} [\mathbf{Cred}]_i [\mathbf{O}_2]_x^{1/4} - [\mathbf{Cox}]_i \right), \quad (\text{S87})$$

where  $[\mathbf{O}_2]_x$  is assumed to be equal to  $\text{C}_{\text{O}_2, \text{cell}}$ ,  $K_{eq,C4} = K_{eq,C4}^0 \cdot [\mathbf{H}^+]_x^4 / [\mathbf{H}^+]_i^2$ , with  $K_{eq,C4}^0 = \exp\left(-(\Delta_r G_{C4}^0 + 4F\Delta\Psi) / RT\right)$  and  $\Delta_r G_{C4}^0 = \Delta_f G_{\text{Cox}}^0 + \Delta_f G_{\text{H}_2\text{O}}^0 - \Delta_r G_{\text{Cred}}^0 - \Delta_r G_{\text{O}_2}^0 = -202.2 \text{ kJ/mol}$ .

F<sub>0</sub>F<sub>1</sub>-ATPase flux:



$$J_{F1} = X_{F1} \left( K_{eq,F1} [\text{ADP}]_x [\text{PI}]_x - [\text{ATP}]_x \right). \quad (\text{S88})$$

where  $K_{eq,F1} = K_{eq,F1}^0 \cdot \frac{[\text{H}^+]_i^{n_A}}{[\text{H}^+]_x^{n_A-1}} \cdot \frac{P_{\text{ATP}}}{P_{\text{ADP}} P_{\text{PI}}}$ , with  $K_{eq,F1}^0 = \exp\left(-(\Delta_r G_{F1}^0 - n_A F \Delta \Psi) / RT\right)$  and

$$\Delta_r G_{F1}^0 = \Delta_f G_{\text{ATP}}^0 + \Delta_f G_{\text{H}_2\text{O}}^0 - \Delta_r G_{\text{ADP}}^0 - \Delta_r G_{\text{PI}}^0 = -4.51 \text{ kJ/mol}.$$

Mitochondrial adenylate kinase flux:

$$J_{\text{AKi}} = X_{\text{AKi}} \left( K_{eq,\text{AK}} [\text{ADP}]_i [\text{ADP}]_i - [\text{AMP}]_i [\text{ATP}]_i \right). \quad (\text{S89})$$

### Mathematical expressions for TCA cycle fluxes

For brevity, values of Michaelis, inhibition, or activation constants are not presented here, but provided in Appendix C of (5). In the following TCA cycle flux expressions, the enzyme activity is represented by  $V_{mf}$ , and  $V_{mr}$  is related to  $V_{mf}$  by obeying the Haldane equation (37).

Pyruvate dehydrogenase flux:

$$J_{\text{pdh}} = \frac{V_{mf} \left( 1 - \frac{1}{K_{eq,\text{pdh}}} \frac{[\text{P}][\text{Q}][\text{R}]}{[\text{A}][\text{B}][\text{C}]} \right)}{K_{mC} \alpha_{i2} [\text{A}][\text{B}] + K_{mB} \alpha_{i1} [\text{A}][\text{C}] + K_{mA} [\text{B}][\text{C}] + [\text{A}][\text{B}][\text{C}]}, \quad (\text{S90})$$

where  $[\text{A}] = [\text{PYR}]$ ,  $[\text{B}] = [\text{COASH}]$ ,  $[\text{C}] = [\text{NAD}]$ ,  $[\text{P}] = [\text{CO}_2\text{tot}]$ ,  $[\text{Q}] = [\text{ACCOA}]$ , and  $[\text{R}] = [\text{NADH}]$ ,

$$K_{eq,\text{pdh}} = K_{eq,\text{pdh}}^0 \frac{1}{[\text{H}^+]} \frac{P_{\text{CO}_2\text{tot}} P_{\text{ACCOA}} P_{\text{NADH}}}{P_{\text{PYR}} P_{\text{COASH}} P_{\text{NAD}}} \text{ with } K_{eq,\text{pdh}}^0 = \exp\left(-\frac{\Delta_r G_{\text{pdh}}^0}{RT}\right) = 5.02 \times 10^{-4} \text{ M}^{-1}.$$

Citrate Synthase flux:

$$J_{\text{cits}} = \frac{V_{mf} \left( [\text{A}][\text{B}] - \frac{[\text{P}][\text{Q}]}{K_{eq,\text{cits}}} \right)}{K_{ia} K_{mB} \alpha_{i1} + K_{mA} \alpha_{i1} [\text{B}] + K_{mB} \alpha_{i2} [\text{A}] + [\text{A}][\text{B}]}, \quad (\text{S91})$$

where  $[\text{A}] = [\text{OAA}]$ ,  $[\text{B}] = [\text{ACCOA}]$ ,  $[\text{P}] = [\text{COASH}]$ , and  $[\text{Q}] = [\text{CIT}]$ ,

$$K_{eq,\text{cits}} = K_{eq,\text{cits}}^0 \frac{1}{[\text{H}^+]^2} \frac{P_{\text{COA}} P_{\text{CIT}}}{P_{\text{OAA}} P_{\text{ACCOA}}} \text{ with } K_{eq,\text{cits}}^0 = \exp\left(-\frac{\Delta_r G_{\text{cits}}^0}{RT}\right) = 7.34 \times 10^{-8} \text{ M}^{-1}.$$

Aconitase flux:

$$J_{\text{acon}} = \frac{V_{mf} V_{mr} \left( [\text{A}] - \frac{[\text{P}]}{K_{eq,\text{acon}}} \right)}{K_{mA} V_{mr} + V_{mr} [\text{A}] + \frac{V_{mf}}{K_{eq,\text{acon}}} [\text{P}]}, \quad (\text{S92})$$

where  $[\text{A}] = [\text{CIT}]$  and  $[\text{P}] = [\text{ICIT}]$ ,  $K_{eq,\text{acon}} = K_{eq,\text{acon}}^0 \frac{P_{\text{ICIT}}}{P_{\text{CIT}}}$  with  $K_{eq,\text{acon}}^0 = \exp\left(-\frac{\Delta_r G_{\text{acon}}^0}{RT}\right) = 7.59 \times 10^{-2}$ .

Isocitrate dehydrogenase flux:

$$J_{\text{isod}} = \frac{V_{mf} \left( 1 - \frac{1}{K_{eq,\text{isod}}} \frac{[P][Q][R]}{[A][B]} \right)}{1 + \left( \frac{K_{mB}}{[B]} \right)^{n_H} \alpha_i + \frac{K_{mA}}{[A]} \left( 1 + \left( \frac{K_{ib}}{[B]} \right)^{n_H} \alpha_i + \frac{[Q]}{K_{iq}} \alpha_i \right)}, \quad (\text{S93})$$

where [A] = [NAD], [B] = [ICIT], [P] = [AKG], [Q] = [NADH], and [R] = [CO<sub>2</sub>tot],

$$K_{eq,\text{isod}} = K_{eq,\text{isod}}^0 \frac{1}{[H^+]^2} \frac{P_{AKG} P_{NADH} P_{CO_2\text{tot}}}{P_{NAD} P_{ICIT}} \text{ with } K_{eq,\text{isod}}^0 = \exp\left(-\frac{\Delta_r G_{\text{isod}}^0}{RT}\right) = 3.50 \times 10^{-16}.$$

$\alpha$ -Ketoglutarate dehydrogenase flux:

$$J_{\text{akgd}} = \frac{V_{mf} \left( 1 - \frac{1}{K_{eq,\text{akgd}}} \frac{[P][Q][R]}{[A][B][C]} \right)}{\left( 1 + \frac{K_{mA}}{[A]} \alpha_i + \frac{K_{mB}}{[B]} \left( 1 + \frac{[Q]}{K_{iq}} \right) + \frac{K_{mC}}{[C]} \left( 1 + \frac{[R]}{K_{ir}} \right) \right)}, \quad (\text{S94})$$

where [A] = [AKG], [B] = [COASH], [C] = [NAD], [P] = [CO<sub>2</sub>tot], [Q] = [SCOA], and [R] = [NADH],

$$K_{eq,\text{akgd}} = K_{eq,\text{akgd}}^0 \frac{1}{[H^+]} \frac{P_{CO_2\text{tot}} P_{SCOA} P_{NADH}}{P_{AKG} P_{COASH} P_{NAD}} \text{ with } K_{eq,\text{akgd}}^0 = \exp\left(-\frac{\Delta_r G_{\text{akgd}}^0}{RT}\right) = 6.93 \times 10^{-3}.$$

Succiny-CoA synthetase flux:

$$J_{\text{scoas}} = \frac{V_{mf} V_{mr} \left( [A][B][C] - \frac{[P][Q][R]}{K_{eq,\text{scoas}}} \right)}{V_{mr} K_{ia} K_{ib} K_{mC} + V_{mr} K_{ib} K_{mC} [A] + V_{mr} K_{ia} K_{mB} [C] + V_{mr} K_{mC} [A][B] + V_{mr} K_{mB} [A][C] + V_{mr} K_{mA} [B][C] + V_{mr} [A][B][C] + \frac{V_{mf} K_{ir} K_{mQ} [P]}{K_{eq,\text{scoas}}} + \frac{V_{mf} K_{iq} K_{mP} [R]}{K_{eq,\text{scoas}}} + \frac{V_{mf} K_{mR} [P][Q]}{K_{eq,\text{scoas}}} + \frac{V_{mf} K_{mQ} [P][R]}{K_{eq,\text{scoas}}} + \frac{V_{mf} K_{mP} [Q][R]}{K_{eq,\text{scoas}}} + \frac{V_{mf} [P][Q][R]}{K_{eq,\text{scoas}}} + \frac{V_{mf} K_{mQ} K_{ir} [A][P]}{K_{ia} K_{eq,\text{scoas}}} + \frac{V_{mr} K_{ia} K_{mB} [C][R]}{K_{ir}} + \frac{V_{mf} K_{mQ} K_{ir} [A][B][P]}{K_{ia} K_{ib} K_{eq,\text{scoas}}} + \frac{V_{mr} K_{mA} [B][C][R]}{K_{ir}} + \frac{V_{mf} K_{mR} [A][P][Q]}{K_{ia} K_{eq,\text{scoas}}} + \frac{V_{mr} K_{ia} K_{mB} [C][Q][R]}{K_{iq} K_{ir}} + \frac{V_{mf} K_{ir} K_{mQ} [A][B][C][P]}{K_{ia} K_{ib} K_{ic} K_{eq,\text{scoas}}} + \frac{V_{mf} K_{ip} K_{mR} [A][B][C][Q]}{K_{ia} K_{ib} K_{ic} K_{eq,\text{scoas}}} + \frac{V_{mf} K_{mR} [A][B][P][Q]}{K_{ia} K_{ib} K_{eq,\text{scoas}}} + \frac{V_{mr} K_{mA} [B][C][Q][R]}{K_{iq} K_{ir}} + \frac{V_{mr} K_{mA} K_{ic} [B][P][Q][R]}{K_{ip} K_{iq} K_{ir}} + \frac{V_{mr} K_{ia} K_{mB} [C][P][Q][R]}{K_{ip} K_{iq} K_{ir}} + \frac{V_{mf} K_{mR} [A][B][C][P][Q]}{K_{ia} K_{ib} K_{ic} K_{eq,\text{scoas}}} + \frac{V_{mr} K_{mA} [B][C][P][Q][R]}{K_{ip} K_{iq} K_{ir}}}, \quad (\text{S95})$$

where  $[A] = [\text{GDP}]$ ,  $[B] = [\text{SCOA}]$ ,  $[C] = [\text{PI}]$ ,  $[P] = [\text{COASH}]$ ,  $[Q] = [\text{SUC}]$ , and  $[R] = [\text{GTP}]$ ,

$$K_{eq,scoas} = K_{eq,scoas}^0 \frac{1}{[\text{H}^+]} \frac{P_{\text{COASH}} P_{\text{SUC}} P_{\text{GTP}}}{P_{\text{GDP}} P_{\text{SCOA}} P_{\text{PI}}} \text{ with } K_{eq,scoas}^0 = \exp\left(-\frac{\Delta_r G_{scoas}^0}{RT}\right) = 9.54 \times 10^{-9} \text{ M}^{-1}.$$

Succinate dehydrogenase flux:

$$J_{\text{sdh}} = \frac{V_{mf} V_{mr} \left( [A][B] - \frac{[P][Q]}{K_{eq,\text{sdh}}} \right)}{V_{mr} K_{ia} K_{mB} \alpha_i + V_{mr} K_{mB} [A] + V_{mr} K_{mA} \alpha_i [B] + \frac{V_{mf} K_{mQ} \alpha_i}{K_{eq,\text{sdh}}} [P] + \frac{V_{mf} K_{mP}}{K_{eq,\text{sdh}}} [Q] + V_{mr} [A][B] + \frac{V_{mf} K_{mQ}}{K_{eq,\text{sdh}} K_{ia}} [A][P] + \frac{V_{mr} K_{mA}}{K_{iq}} [B][Q] + \frac{V_{mf}}{K_{eq,\text{sdh}}} [P][Q]}, \quad (\text{S96})$$

where  $A] = [\text{SUC}]$ ,  $[B] = [\text{COQ}]$ ,  $[P] = [\text{QH}_2]$ , and  $[Q] = [\text{FUM}]$ ,  $K_{eq,\text{sdh}} = K_{eq,\text{sdh}}^0 \frac{P_{\text{QH}_2} P_{\text{FUM}}}{P_{\text{SUC}} P_{\text{COQ}}}$  with

$$K_{eq,\text{sdh}}^0 = \exp\left(-\frac{\Delta_r G_{\text{sdh}}^0}{RT}\right) = 1.69.$$

Fumarase flux:

$$J_{\text{fum}} = \frac{V_{mf} V_{mr} \left( [A] - \frac{[P]}{K_{eq,\text{fum}}} \right)}{K_{mA} V_{mr} \alpha_i + V_{mr} [A] + \frac{V_{mf} [P]}{K_{eq,\text{fum}}}}, \quad (\text{S97})$$

where  $[A] = [\text{FUM}]$  and  $[P] = [\text{MAL}]$ ,  $K_{eq,\text{fum}} = K_{eq,\text{fum}}^0 \frac{P_{\text{MAL}}}{P_{\text{FUM}}}$  with  $K_{eq,\text{fum}}^0 = \exp\left(-\frac{\Delta_r G_{\text{fum}}^0}{RT}\right) = 4.04 \text{ M}^{-1}$ .

Malate dehydrogenase flux:

$$J_{\text{mdh}} = \frac{V_{mf} V_{mr} \left( [A][B] - \frac{[P][Q]}{K_{eq,\text{mdh}}} \right)}{V_{mr} K_{ia} K_{mB} \alpha_i + V_{mr} K_{mB} [A] + V_{mr} K_{mA} \alpha_i [B] + \frac{V_{mf} K_{mQ} \alpha_i [P]}{K_{eq,\text{mdh}}} + \frac{V_{mf} K_{mP} [Q]}{K_{eq,\text{mdh}}} + V_{mr} [A][B] + \frac{V_{mf} K_{mQ} [A][P]}{K_{eq,\text{mdh}} K_{ia}} + \frac{V_{mf} [P][Q]}{K_{eq,\text{mdh}}} + \frac{V_{mr} K_{mA} [B][Q]}{K_{iq}} + \frac{V_{mr} [A][B][P]}{K_{ip}} + \frac{V_{mf} [B][P][Q]}{K_{ib} K_{eq,\text{mdh}}}}, \quad (\text{S98})$$

where  $[A] = [\text{NAD}]$ ,  $[B] = [\text{MAL}]$ ,  $[P] = [\text{OAA}]$ , and  $[Q] = [\text{NADH}]$ ,  $K_{eq,mdh} = K_{eq,mdh}^0 \frac{1}{[\text{H}^+]} \frac{P_{\text{OAA}} P_{\text{NADH}}}{P_{\text{NAD}} P_{\text{MAL}}}$

$$\text{with } K_{eq,mdh}^0 = \exp\left(-\frac{\Delta_r G_{mdh}^0}{RT}\right) = 2.27 \times 10^{-12}.$$

Nucleoside diphosphokinase flux:

$$J_{ndk} = \frac{V_{mf} V_{mr} \left( [A][B] - \frac{[P][Q]}{K_{eq,ndk}} \right) / \alpha_i}{V_{mr} K_{mB}[A] + V_{mr} K_{mA}[B] + \frac{V_{mf} K_{mQ}[P]}{K_{eq,ndk}} + \frac{V_{mf} K_{mP}[Q]}{K_{eq,ndk}} + V_{mr} [A][B] + \frac{V_{mf} K_{mQ}[A][P]}{K_{eq,ndk} K_{ia}} + \frac{V_{mf} [P][Q]}{K_{eq,ndk}} + \frac{V_{mr} K_{mA}[B][Q]}{K_{iq}}}, \quad (\text{S99})$$

where  $[A] = [\text{GTP}]$ ,  $[B] = [\text{ADP}]$ ,  $[P] = [\text{GDP}]$ , and  $[Q] = [\text{ATP}]$ ,  $K_{eq,ndk} = K_{eq,ndk}^0$  with

$$K_{eq,ndk}^0 = \exp\left(-\frac{\Delta_r G_{ndk}^0}{RT}\right) = 1.$$

Glutamate oxaloacetate transaminase flux:

$$J_{got} = \frac{V_{mf} V_{mr} \left( [A][B] - \frac{[P][Q]}{K_{eq,got}} \right)}{V_{mr} K_{mB}[A] + V_{mr} K_{mA}[B] + \frac{V_{mf} K_{mQ}[P]}{K_{eq,got}} + \frac{V_{mf} K_{mP}[Q]}{K_{eq,got}} + V_{mr} [A][B] + \frac{V_{mf} K_{mQ}[A][P]}{K_{eq,got} K_{ia}} + \frac{V_{mf} [P][Q]}{K_{eq,got}} + \frac{V_{mr} K_{mA}[B][Q]}{K_{iq}}}, \quad (\text{S100})$$

where  $[A] = [\text{ASP}]$ ,  $[B] = [\text{AKG}]$ ,  $[P] = [\text{OAA}]$ , and  $[Q] = [\text{GLU}]$ ,  $K_{eq,got} = K_{eq,got}^0 \frac{P_{\text{OAA}} P_{\text{GLU}}}{P_{\text{ASP}} P_{\text{AKG}}}$  with

$$K_{eq,got}^0 = \exp\left(-\frac{\Delta_r G_{got}^0}{RT}\right) = 1.77.$$

## Mathematical expressions for substrate and cation transport across the inner mitochondrial membrane

Adenine nucleotide translocase (ANT) flux:

$$J_{ANT} = x_{ANT} \frac{k_2^{\text{ANT}} q \frac{[\text{ATP}^{4+}]_x [\text{ADP}^{3-}]_i}{K_o^{\text{D}}} - k_3^{\text{ANT}} \frac{[\text{ATP}^{4+}]_i [\text{ADP}^{3-}]_x}{K_o^{\text{T}}}}{\left( 1 + \frac{[\text{ATP}^{4+}]_i}{K_o^{\text{T}}} + \frac{[\text{ADP}^{3-}]_i}{K_o^{\text{D}}} \right) \left( \frac{[\text{ATP}^{4+}]_x}{K_o^{\text{T}}} + q \frac{[\text{ADP}^{3-}]_x}{K_o^{\text{D}}} \right)}, \quad (\text{S101})$$

where

$$k_2^{\text{ANT}} = k_2^{\text{ANT},o} \exp\left(\left(-3a_1 - 4a_2 + a_3\right) \frac{F\Delta\Psi}{RT}\right), \quad (\text{S102})$$

$$k_3^{\text{ANT}} = k_3^{\text{ANT},o} \exp\left(\left(-4a_1 - 3a_2 + a_3\right) \frac{F\Delta\Psi}{RT}\right), \quad (\text{S103})$$

$$K_o^{\text{D}} = K_o^{\text{D},o} \exp\left(\frac{3\delta_D RT}{F\Delta\Psi}\right), \quad (\text{S104})$$

$$K_o^{\text{T}} = K_o^{\text{T},o} \exp\left(\frac{4\delta_T RT}{F\Delta\Psi}\right), \quad (\text{S105})$$

and

$$q = \frac{k_3^{\text{ANT}} K_o^{\text{D}}}{k_2^{\text{ANT}} K_o^{\text{T}}} \exp\left(\frac{F\Delta\Psi}{RT}\right), \quad (\text{S106})$$

with  $k_2^{\text{ANT},o} = 0.159 \text{ sec}^{-1}$ ,  $k_3^{\text{ANT},o} = 0.501 \text{ sec}^{-1}$ ,  $K_o^{\text{D},o} = 38.89 \text{ mM}$ ,  $K_o^{\text{T},o} = 56.05 \text{ mM}$ ,  $a_1 = 0.2829$ ,  $a_2 = -0.2086$ ,  $a_3 = 0.2372$ ,  $\delta_T = 0.0167$ , and  $\delta_D = 0.0699$  (cited from Supplemental Material of (1)).

Phosphate-hydrogen co-transporter flux:

$$J_{\text{PIHT}} = X_{\text{PIHT}} \cdot \frac{[\text{H}_2\text{PO}_4^-]_i [\text{H}^+]_i - [\text{H}_2\text{PO}_4^-]_x [\text{H}^+]_x}{k_{\text{PIHT}} \left(1 + [\text{H}_2\text{PO}_4^-]_i / k_{\text{PIHT}}\right) \left(1 + [\text{H}_2\text{PO}_4^-]_x / k_{\text{PIHT}}\right)}. \quad (\text{S107})$$

Potassium-hydrogen exchange flux:

$$J_{\text{KH}} = X_{\text{KH}} \left([\text{K}^+]_i [\text{H}^+]_x - [\text{K}^+]_x [\text{H}^+]_i\right). \quad (\text{S108})$$

Pyruvate-hydrogen co-transporter flux:

$$J_{\text{PYRH}} = X_{\text{PYRH}} \left([\text{PYR}^-]_i [\text{H}^+]_i - [\text{PYR}^-]_x [\text{H}^+]_x\right). \quad (\text{S109})$$

Glutamate-hydrogen co-transporter flux:

$$J_{\text{GLUH}} = X_{\text{GLUH}} \left([\text{GLU}^-]_i [\text{H}^+]_i - [\text{GLU}^-]_x [\text{H}^+]_x\right). \quad (\text{S110})$$

Citrate-malate exchange flux:

$$J_{\text{CITMAL}} = X_{\text{CITMAL}} \left([\text{HCIT}^{2-}]_i [\text{MAL}^{2-}]_x - [\text{HCIT}^{2-}]_x [\text{MAL}^{2-}]_i\right). \quad (\text{S111})$$

$\alpha$ -Ketoglutarate-malate exchange flux:

$$J_{\text{AKGMAL}} = \frac{X_{\text{AKGMAL}} \left([\text{AKG}^{2-}]_i [\text{MAL}^{2-}]_x - [\text{AKG}^{2-}]_x [\text{MAL}^{2-}]_i\right)}{r_{\text{AKGMAL}} \alpha_{out1} + (1 - r_{\text{AKGMAL}}) \alpha_{in1} + [\text{AKG}^{2-}]_i [\text{MAL}^{2-}]_x \alpha_{in2} / K_{d,\text{AKGMAL}} + [\text{AKG}^{2-}]_x [\text{MAL}^{2-}]_i \alpha_{out2} / K_{d,\text{AKGMAL}} + [\text{AKG}^{2-}]_i [\text{MAL}^{2-}]_x [\text{AKG}^{2-}]_x [\text{MAL}^{2-}]_i / K_{d,\text{AKGMAL}}^2}, \quad (\text{S112})$$

where  $r_{AKGMAL}$  and  $K_{d,AKGMAL}$  are adjustable parameters, and  $\alpha_{out1}$ ,  $\alpha_{in1}$ ,  $\alpha_{out2}$ , and  $\alpha_{in2}$  are inhibition coefficients for the exchanger. The inhibition coefficients are computed as:

$$\alpha_{out1} = 1 + [\text{CIT}]_i / K_{iCIT} + [\text{GLU}]_i / K_{iGLU} + [\text{ASP}]_i / K_{iASP} + [\text{SUC}]_i / K_{iSUC},$$

$$\alpha_{in1} = 1 + [\text{CIT}]_x / K_{iCIT} + [\text{GLU}]_x / K_{iGLU} + [\text{ASP}]_x / K_{iASP} + [\text{SUC}]_x / K_{iSUC},$$

$$\alpha_{out2} = 1 + r_{AKGMAL} ([\text{CIT}]_i / K_{iCIT} + [\text{GLU}]_i / K_{iGLU} + [\text{ASP}]_i / K_{iASP} + [\text{SUC}]_i / K_{iSUC}),$$

$$\alpha_{in2} = 1 + r_{AKGMAL} ([\text{CIT}]_x / K_{iCIT} + [\text{GLU}]_x / K_{iGLU} + [\text{ASP}]_x / K_{iASP} + [\text{SUC}]_x / K_{iSUC}),$$

with  $K_{iCIT} = 3.6$  mM,  $K_{iGLU} = 2.5$  mM,  $K_{iASP} = 2.7$  mM, and  $K_{iSUC} = 1.6$  mM (cited from reference (38)).

Succinate/phosphate exchange flux:

$$J_{\text{SUCPI}} = X_{\text{SUCPI}} ([\text{SUC}^{2-}]_i [\text{PI}^{2-}]_x - [\text{SUC}^{2-}]_x [\text{PI}^{2-}]_i). \quad (\text{S113})$$

Malate/phosphate exchange flux:

$$J_{\text{MALPI}} = X_{\text{MALPI}} ([\text{MAL}^{2-}]_i [\text{PI}^{2-}]_x - [\text{MAL}^{2-}]_x [\text{PI}^{2-}]_i). \quad (\text{S114})$$

Fumarate-succinate exchange flux:

$$J_{\text{FUMSUC}} = X_{\text{FUMSUC}} ([\text{FUM}^{2-}]_i [\text{SUC}^{2-}]_x - [\text{FUM}^{2-}]_x [\text{SUC}^{2-}]_i). \quad (\text{S115})$$

Aspartate-glutamate exchange flux:

$$J_{\text{ASPGLU}} = X_{\text{ASPGLU}} \cdot \frac{e^{-F\Delta\Psi/RT} [\text{ASP}^-]_i [\text{HGLU}^0]_x - [\text{ASP}^-]_x [\text{HGLU}^0]_i}{(1 + [\text{ASP}^-]_x [\text{HGLU}^0]_i / K_{d,ASPGLU}) (1 + [\text{ASP}^-]_i [\text{HGLU}^0]_x / K_{d,ASPGLU})}, \quad (\text{S116})$$

where  $K_{d,ASPGLU}$  is an adjustable parameter.

Proton leak flux:

$$J_{\text{Hle}} = X_{\text{Hle}} \Delta\Psi \left( \frac{[\text{H}^+]_c e^{+F\Delta\Psi/RT} - [\text{H}^+]_x}{e^{+F\Delta\Psi/RT} - 1} \right). \quad (\text{S117})$$

### Mathematical expressions for passive permeation across the outer mitochondrial membrane

Adenine nucleoside permeation fluxes:

$$J_{\text{ATPt}} = \gamma p_A ([\text{ATP}]_c - [\text{ATP}]_i) \quad (\text{S118})$$

$$J_{\text{ADPt}} = \gamma p_A ([\text{ADP}]_c - [\text{ADP}]_i) \quad (\text{S119})$$

$$J_{\text{AMPt}} = \gamma p_A ([\text{AMP}]_c - [\text{AMP}]_i). \quad (\text{S120})$$

Inorganic phosphate permeation flux:

$$J_{\text{PIt}} = \gamma p_{\text{PI}} ([\text{PI}]_c - [\text{PI}]_i). \quad (\text{S121})$$

TCA cycle intermediate permeation fluxes:

$$J_{\text{PYRt}} = \gamma p_{\text{TI}} ([\text{PYR}]_c - [\text{PYR}]_i) \quad (\text{S122})$$

$$J_{\text{CITt}} = \gamma p_{\text{TI}} ([\text{CIT}]_c - [\text{CIT}]_i) \quad (\text{S123})$$

$$J_{\text{MALt}} = \gamma p_{\text{TI}} ([\text{MAL}]_c - [\text{MAL}]_i) \quad (\text{S124})$$

$$J_{\text{AKGt}} = \gamma p_{\text{TI}} ([\text{AKG}]_c - [\text{AKG}]_i) \quad (\text{S125})$$

$$J_{\text{SUCt}} = \gamma p_{\text{TI}} ([\text{SUC}]_c - [\text{SUC}]_i) \quad (\text{S126})$$

$$J_{\text{FUMt}} = \gamma p_{\text{TI}} ([\text{FUM}]_c - [\text{FUM}]_i) \quad (\text{S127})$$

$$J_{\text{GLUt}} = \gamma p_{\text{TI}} ([\text{GLU}]_c - [\text{GLU}]_i) \quad (\text{S128})$$

$$J_{\text{ASPt}} = \gamma p_{\text{TI}} ([\text{ASP}]_c - [\text{ASP}]_i). \quad (\text{S129})$$

### Mathematical expressions for cytoplasmic reaction fluxes

Mitochondrial adenylate kinase flux:

$$J_{\text{AKi}} = X_{\text{AKi}} \left( K_{\text{eq,AK}} [\text{ADP}^{3-}]_i^2 - [\text{AMP}^{2-}]_i [\text{ATP}^4]_i \right), \quad (\text{S130})$$

where  $X_{\text{AKi}}$  is an large arbitrary value to maintain the reaction around equilibrium.

Cytoplasmic adenylate kinase flux:

$$J_{\text{AKc}} = X_{\text{AKc}} \left( K_{\text{eq,AK}} [\text{ADP}^{3-}]_c^2 - [\text{AMP}^{2-}]_c [\text{ATP}^4]_c \right), \quad (\text{S131})$$

where  $X_{\text{AKc}}$  is an large arbitrary value to maintain the reaction around equilibrium.

Creatine kinase flux:

$$J_{\text{CKc}} = X_{\text{CKc}} \left( K_{\text{eq,CK}} [\text{ADP}^{3-}]_c [\text{PCr}^{2-}]_c [\text{H}^+]_c - [\text{ATP}^4]_c [\text{Cr}^0]_c \right), \quad (\text{S132})$$

where  $X_{\text{CKc}}$  is an large arbitrary value to maintain the reaction around equilibrium.

## References

1. Wu F, Zhang EY, Zhang J, Bache RJ, & Beard DA (2008) Phosphate metabolite concentrations and ATP hydrolysis potential in normal and ischemic hearts. *J Physiol* 586:4193-4208.
2. Beard DA (2006) Modeling of oxygen transport and cellular energetics explains observations on in vivo cardiac energy metabolism. *PLoS Comput Biol* 2(9):e107.
3. Beard DA, Vinnakota KC, & Wu F (2008) Detailed enzyme kinetics in terms of biochemical species: study of citrate synthase. *PLoS ONE* 3(3):e1825.
4. Vinnakota KC & Bassingthwaighte JB (2004) Myocardial density and composition: a basis for calculating intracellular metabolite concentrations. *Am J Physiol Heart Circ Physiol* 286(5):H1742-1749.
5. Wu F, Yang F, Vinnakota KC, & Beard DA (2007) Computer modeling of mitochondrial tricarboxylic acid cycle, oxidative phosphorylation, metabolite transport, and electrophysiology. *J Biol Chem* 282(34):24525-24537.
6. Zhang J, *et al.* (1993) Bioenergetic abnormalities associated with severe left ventricular hypertrophy. *J Clin Invest* 92(2):993-1003.

7. Bache RJ, *et al.* (1994) High-energy phosphate responses to tachycardia and inotropic stimulation in left ventricular hypertrophy. *Am J Physiol* 266(5 Pt 2):H1959-1970.
8. Bache RJ, *et al.* (1999) Myocardial oxygenation at high workstates in hearts with left ventricular hypertrophy. *Cardiovasc Res* 42(3):616-626.
9. Altman PL & Dittmer DS (1971) *Respiration and circulation* (Federation of American Societies for Experimental Biology, Bethesda, Md.,) pp xxv, 930 p.
10. Christoforides C, Laasberg LH, & Hedley-Whyte J (1969) Effect of temperature on solubility of O<sub>2</sub> in human plasma. *J Appl Physiol* 26(1):56-60.
11. Mahler M, Louy C, Homsher E, & Peskoff A (1985) Reappraisal of diffusion, solubility, and consumption of oxygen in frog skeletal muscle, with applications to muscle energy balance. *J Gen Physiol* 86(1):105-134.
12. Hellums JD, Nair PK, Huang NS, & Ohshima N (1996) Simulation of intraluminal gas transport processes in the microcirculation. *Ann Biomed Eng* 24(1):1-24.
13. McGuire BJ & Secomb TW (2001) A theoretical model for oxygen transport in skeletal muscle under conditions of high oxygen demand. *J Appl Physiol* 91(5):2255-2265.
14. Beard DA & Bassingthwaighte JB (2000) Advection and diffusion of substances in biological tissues with complex vascular networks. *Ann Biomed Eng* 28(3):253-268.
15. Pagel PS, *et al.* (1998) RSR13, a synthetic modifier of hemoglobin-oxygen affinity, enhances the recovery of stunned myocardium in anesthetized dogs. *J Pharmacol Exp Ther* 285(1):1-8.
16. Schenkman KA, Marble DR, Burns DH, & Feigl EO (1997) Myoglobin oxygen dissociation by multiwavelength spectroscopy. *J Appl Physiol* 82(1):86-92.
17. Kassab GS & Fung YC (1994) Topology and dimensions of pig coronary capillary network. *Am J Physiol* 267(1 Pt 2):H319-325.
18. Caldwell JH, Martin GV, Raymond GM, & Bassingthwaighte JB (1994) Regional myocardial flow and capillary permeability-surface area products are nearly proportional. *Am J Physiol* 267(2 Pt 2):H654-666.
19. Deussen A & Bassingthwaighte JB (1996) Modeling [<sup>15</sup>O]oxygen tracer data for estimating oxygen consumption. *Am J Physiol* 270(3 Pt 2):H1115-1130.
20. Wu F, Jeneson JA, & Beard DA (2007) Oxidative ATP synthesis in skeletal muscle is controlled by substrate feedback. *Am J Physiol Cell Physiol* 292(1):C115-124.
21. Vogt M, *et al.* (2001) Molecular adaptations in human skeletal muscle to endurance training under simulated hypoxic conditions. *J Appl Physiol* 91(1):173-182.
22. Beard DA (2005) A Biophysical Model of the Mitochondrial Respiratory System and Oxidative Phosphorylation. *PLoS Comput Biol* 1(4):e36.
23. Munoz DR, de Almeida M, Lopes EA, & Iwamura ES (1999) Potential definition of the time of death from autolytic myocardial cells: a morphometric study. *Forensic Sci Int* 104(2-3):81-89.
24. Tomashek JJ & Brusilow WS (2000) Stoichiometry of Energy Coupling by Proton-Translocating ATPases: A History of Variability. *J Bioenerg Biomembr* 32(5):493-500.
25. Vendelin M, Kongas O, & Saks V (2000) Regulation of mitochondrial respiration in heart cells analyzed by reaction-diffusion model of energy transfer. *American Journal of Physiology - Cell Physiology* 278(4):C747-764.
26. Lee AC, Zizi M, & Colombini M (1994) Beta-NADH decreases the permeability of the mitochondrial outer membrane to ADP by a factor of 6. *J Biol Chem* 269(49):30974-30980.



27. Gentet LJ, Stuart GJ, & Clements JD (2000) Direct measurement of specific membrane capacitance in neurons. *Biophys J* 79(1):314-320.
28. Kapus A, Ligeti E, & Fonyo A (1989) Na<sup>+</sup>/H<sup>+</sup> exchange in mitochondria as monitored by BCECF fluorescence. *FEBS Lett* 251(1-2):49-52.
29. Vaughan-Jones RD, Peercy BE, Keener JP, & Spitzer KW (2002) Intrinsic H(+) ion mobility in the rabbit ventricular myocyte. *J Physiol* 541(Pt 1):139-158.
30. Jeneson JA, Westerhoff HV, Brown TR, Van Echteld CJ, & Berger R (1995) Quasi-linear relationship between Gibbs free energy of ATP hydrolysis and power output in human forearm muscle. *Am J Physiol* 268(6 Pt 1):C1474-1484.
31. Veech RL, Lawson JW, Cornell NW, & Krebs HA (1979) Cytosolic phosphorylation potential. *J Biol Chem* 254(14):6538-6547.
32. Alberty RA (2003) *Thermodynamics of Biochemical Reactions* (John Wiley & Sons, Hoboken, N.J.).
33. NIST (Database 46: Critical Stability Constants. (National Institute of Standards and Technology).
34. Wu F, Jeneson JAL, & Beard DA (2006) Oxidative ATP synthesis in skeletal muscle is controlled by substrate feedback. *Am J Physiol--Cell Physiol*:(in press).
35. Beard DA (2006) Modeling of Oxygen Transport and Cellular Energetics Explains Observations on In Vivo Cardiac Energy Metabolism. *PLoS Comput Biol* 2(9).
36. Beard DA & Qian H (2007) *Chemical Biophysics: Quantitative Analysis of Cellular Systems* (Cambridge University Press) (English) 1 Ed p 328.
37. Segel IH (1975) *Enzyme Kinetics* (Wiley Interscience, New York).
38. Palmieri F, Quagliariello E, & Klingenberger M (1972) Kinetics and specificity of the oxoglutarate carrier in rat-liver mitochondria. *Eur J Biochem* 29(3):408-416.
